# Supplementary material for: Planar tetracoordinate oxygen stabilized within triel–chalcogen dicationic frameworks
Source: Royal Society of Chemistry journal article supplement (doi:10.1039/d6ra04411e), 2026-05-29
Supplement: d6ra04411e1.pdf [file d6ra04411e1.pdf]

## Supplementary Information

# Planar Tetracoordinate Oxygen Stabilized within Triel–Chalcogen Dicationic Frameworks

Leinner Motta,<sup>a,b</sup> Jennifer Cuellar,<sup>a,b</sup> Williams García-Argote,<sup>a,c</sup> Dumer S.  
Sacanamboy,<sup>a,b</sup> Viviana Roman-Ventura,<sup>a,b</sup> Angelita Espinoza-Gomez,<sup>d</sup> Diego  
Inostroza,<sup>c</sup> Luis Leyva-Parra,<sup>a,\*</sup> and William Tiznado.<sup>a,\*</sup>

<sup>a</sup> *Centro de Investigación para el Diseño de Materiales (CEDEM), Facultad de Ciencias Exactas, Departamento de Ciencias Químicas, Universidad Andrés Bello, Avenida República 275, Santiago 8370146, Chile*

<sup>b</sup> *Doctorado en Físicoquímica Molecular, Facultad de Ciencias Exactas, Universidad Andrés Bello, República 275, Santiago 8370146, Chile.*

<sup>c</sup> *Centro de Modelación Ambiental y Dinámica de Sistemas (CEMADIS), Facultad de Ingeniería y Negocios, Universidad de Las Américas, Santiago 7500975, Chile*

<sup>d</sup> *Grupo de Química Inorgánica y Materiales Moleculares, Facultad de Ingeniería, Universidad Autónoma de Chile, Del Valle Sur 534, Huechuraba, Santiago, Chile*

E-mail: [luis.leyva@unab.cl](mailto:luis.leyva@unab.cl)

[wtiznado@unab.cl](mailto:wtiznado@unab.cl)

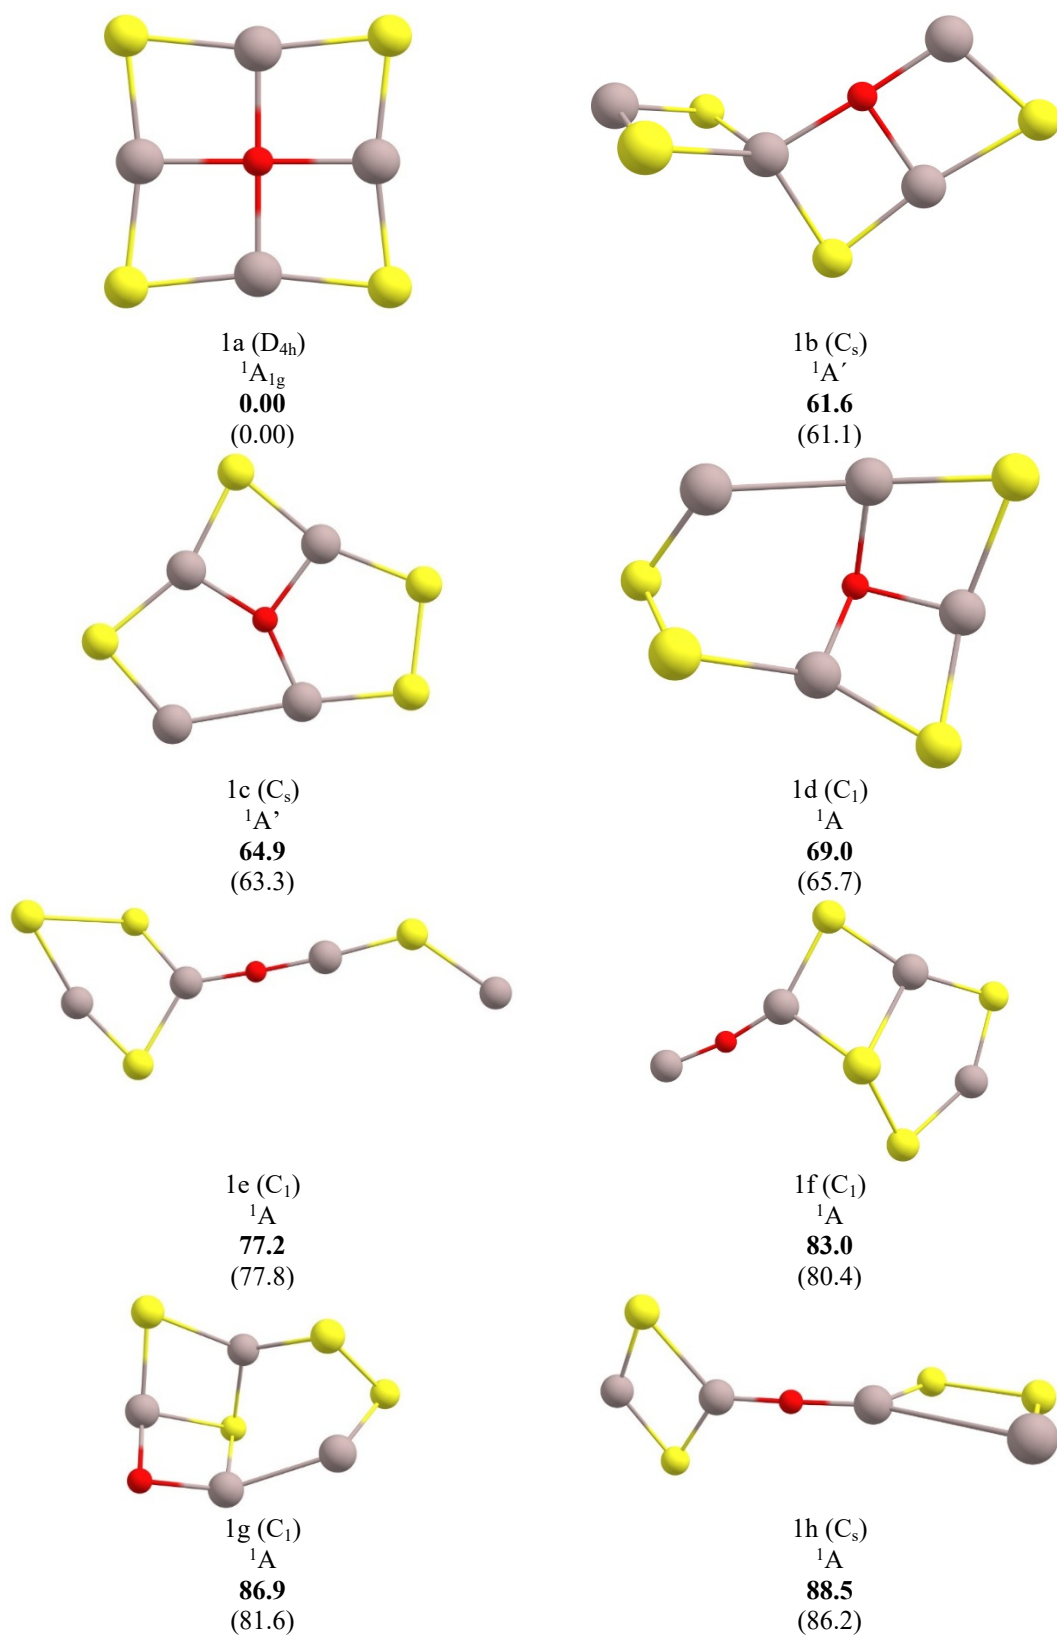

**Fig. S1** Optimized structures within the range of 0-90 kcal.mol<sup>-1</sup> with respect to the global minimum structure of the O@X<sub>4</sub>E<sub>4</sub><sup>2+</sup> cluster (X = Al; E = S) at the PBE0-GD3/def2-TZVP level. Relative energies are listed in kcal.mol<sup>-1</sup> at the single-point CCSD(T)/def2-

TZVP//PBE0-GD3/def2-TZVP (in bold) an PBE0-GD3/def2-TZVP (in parentheses)  
levels, with zero-point energy (ZPE) correction.

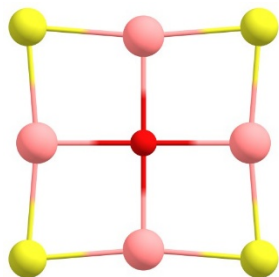

2a ( $D_{4h}$ )  
 $^1A_{1g}$   
**0.00**  
(0.00)

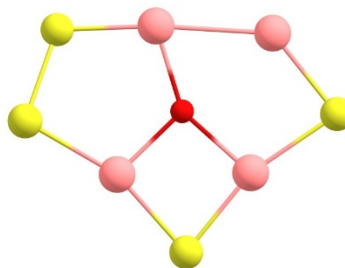

2b ( $C_1$ )  
 $^1A$   
**50.7**  
(43.9)

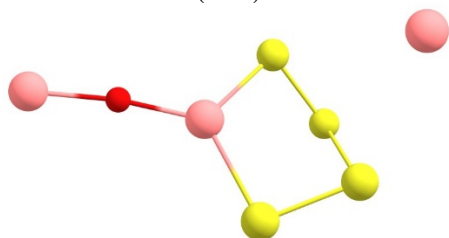

2c ( $C_1$ )  
 $^1A'$   
**64.9**  
(49.2)

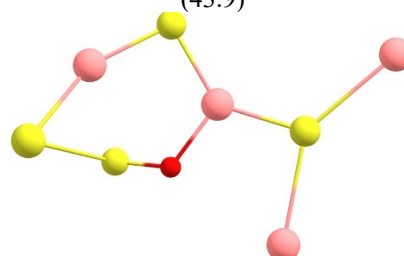

2d ( $C_1$ )  
 $^1A$   
**70.4**  
(51.8)

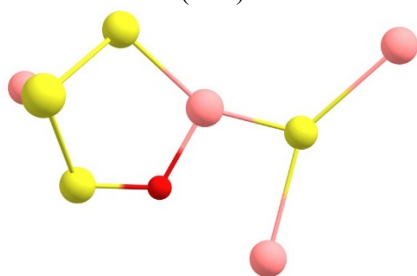

2e ( $C_1$ )  
 $^1A$   
**77.2**  
(56.3)

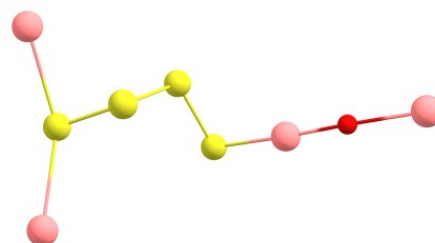

2f ( $C_1$ )  
 $^1A$   
**83.0**  
(65.0)

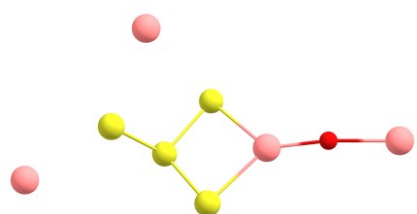

2g ( $C_1$ )  
 $^1A$   
**86.9**  
(66.9)

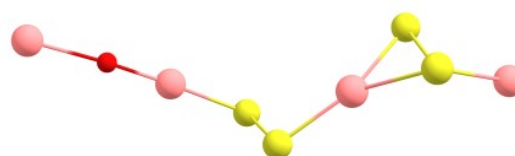

2h ( $C_s$ )  
 $^1A$   
**88.5**  
(67.5)

**Fig. S2** Optimized structures within the range of 0-90 kcal.mol<sup>-1</sup> with respect to the global minimum structure of the O@X<sub>4</sub>E<sub>4</sub><sup>2+</sup> cluster (X = Ga; E = S) at the PBE0-GD3/def2-TZVP level. Relative energies are listed in kcal.mol<sup>-1</sup> at the single-point CCSD(T)/def2-TZVP//PBE0-GD3/def2-TZVP (in bold) and PBE0-GD3/def2-TZVP (in parentheses) levels, with zero-point energy (ZPE) correction.

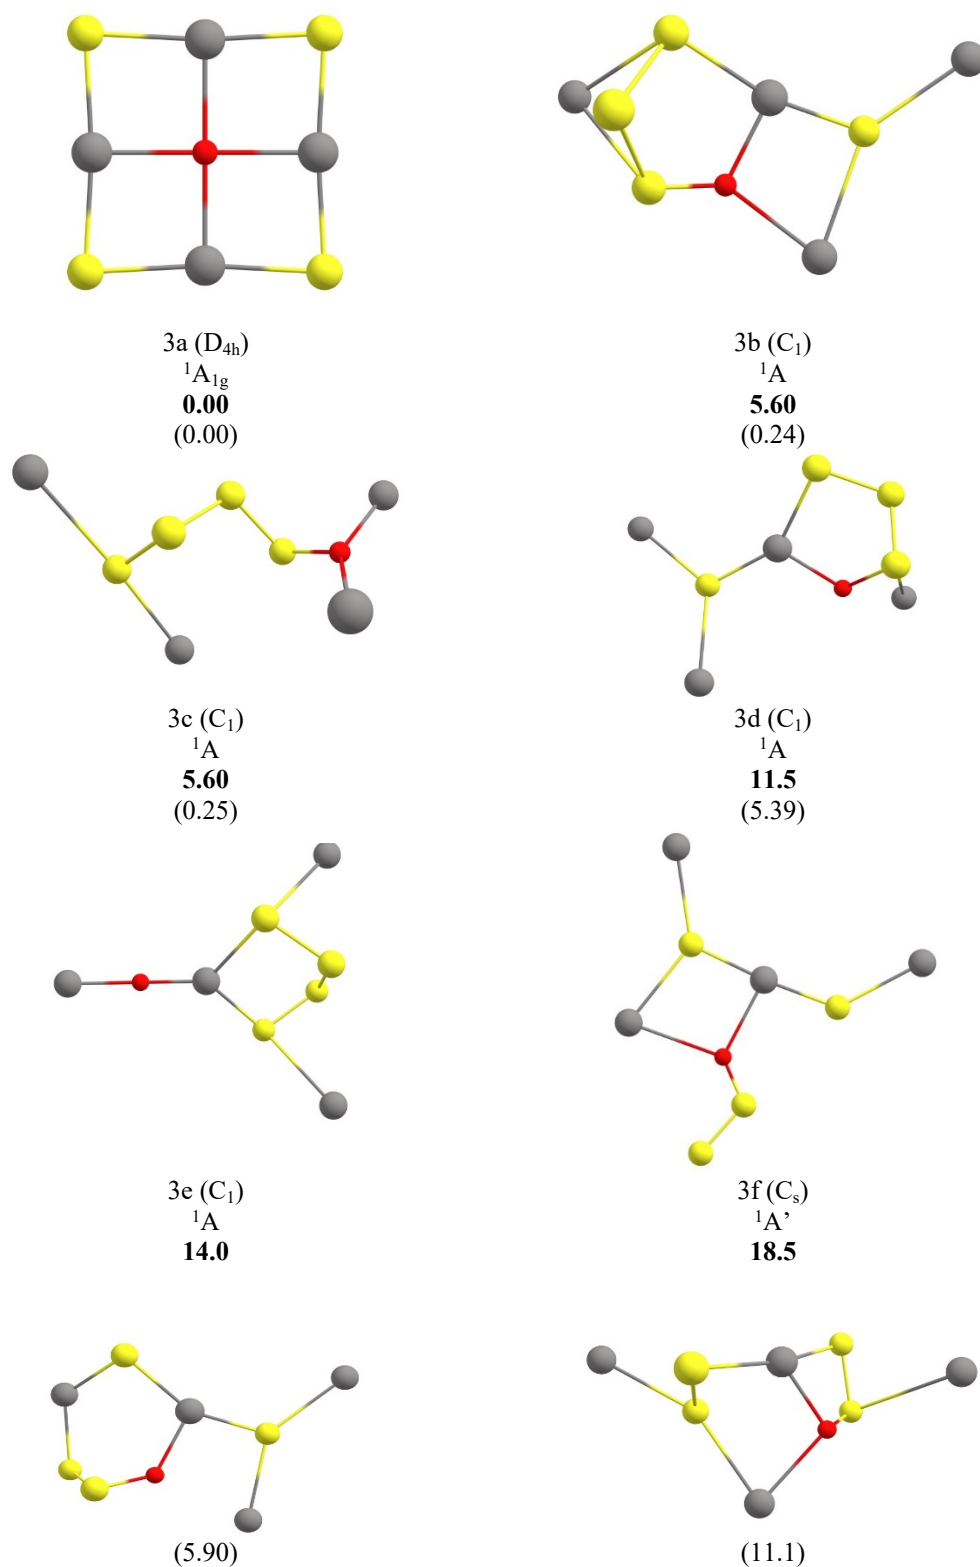

3g (C<sub>1</sub>)  
<sup>1</sup>A  
**21.8**  
 (18.9)

3h (C<sub>s</sub>)  
<sup>1</sup>A  
**22.3**  
 (19.9)

**Fig. S3** Optimized structures within the range of 0-30 kcal.mol<sup>-1</sup> with respect to the global minimum structure of the O@X<sub>4</sub>E<sub>4</sub><sup>2+</sup> cluster (X = In; E = S) at the PBE0-GD3/def2-TZVP level. Relative energies are listed in kcal.mol<sup>-1</sup> at the single-point CCSD(T)/def2-TZVP//PBE0-GD3/def2-TZVP (in bold) an PBE0-GD3/def2-TZVP (in parentheses) levels, with zero-point energy (ZPE) correction.

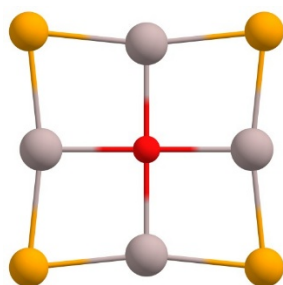

4a (D<sub>4h</sub>)  
<sup>1</sup>A<sub>1g</sub>  
**0.00**  
 (0.00)

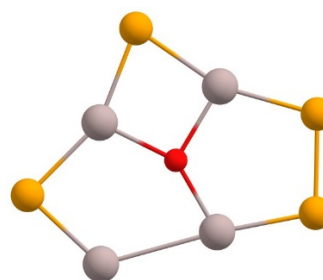

4b (C<sub>s</sub>)  
<sup>1</sup>A  
**60.4**  
 (61.1)

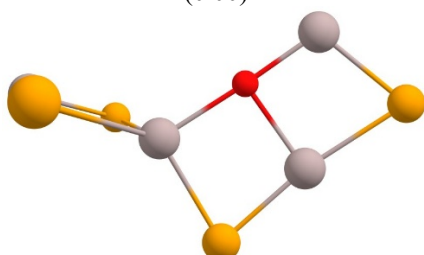

4c (C<sub>s</sub>)  
<sup>1</sup>A'  
**63.5**  
 (63.3)

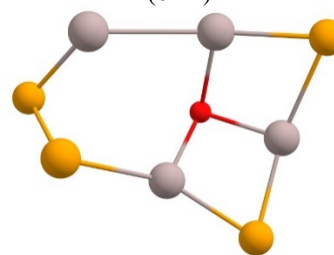

4d (C<sub>1</sub>)  
<sup>1</sup>A  
**67.3**  
 (65.7)

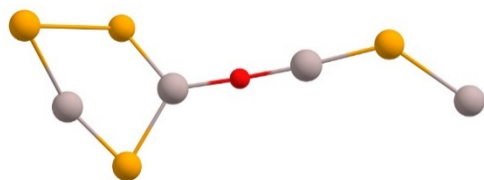

4e (C<sub>1</sub>)  
<sup>1</sup>A  
**81.3**  
 (77.8)

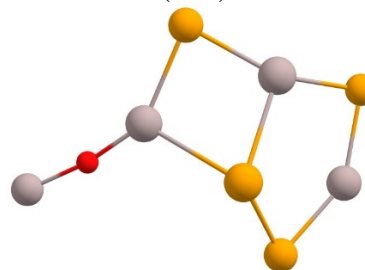

4f (C<sub>1</sub>)  
<sup>1</sup>A  
**83.5**  
 (80.4)

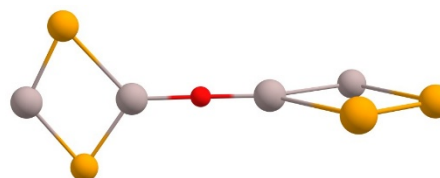

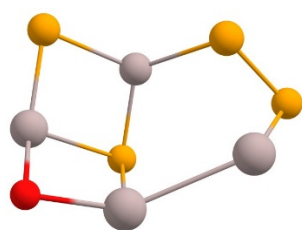

4g ( $C_1$ )  
 $^1A$   
**89.1**  
 (81.6)

4h ( $C_s$ )  
 $^1A$   
**95.1**  
 (86.2)

**Fig. S4** Optimized structures within the range of 0-100 kcal.mol<sup>-1</sup> with respect to the global minimum structure of the O@X<sub>4</sub>E<sub>4</sub><sup>2+</sup> cluster (X = Al; E = Se) at the PBE0-GD3/def2-TZVP level. Relative energies are listed in kcal.mol<sup>-1</sup> at the single-point CCSD(T)/def2-TZVP//PBE0-GD3/def2-TZVP (in bold) an PBE0-GD3/def2-TZVP (in parentheses) levels, with zero-point energy (ZPE) correction.

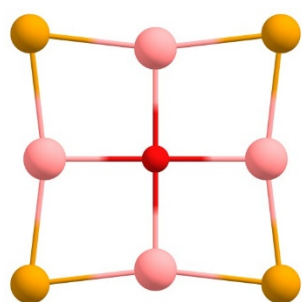

4a ( $D_{4h}$ )  
 $^1A_{1g}$   
**0.00**  
 (0.00)

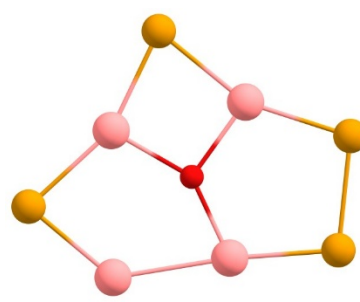

4b ( $C_s$ )  
 $^1A$   
**60.4**  
 (61.1)

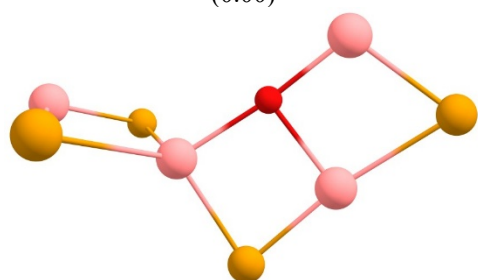

4c ( $C_s$ )  
 $^1A'$   
**63.9**  
 (63.3)

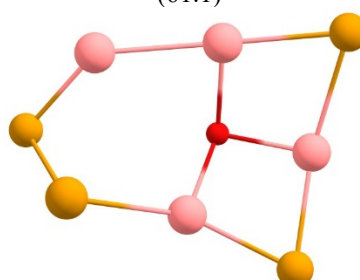

4d ( $C_1$ )  
 $^1A$   
**63.9**  
 (65.7)

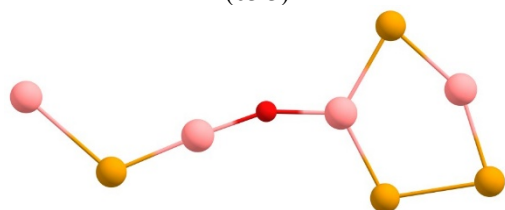

4e ( $C_1$ )  
 $^1A$   
**79.1**

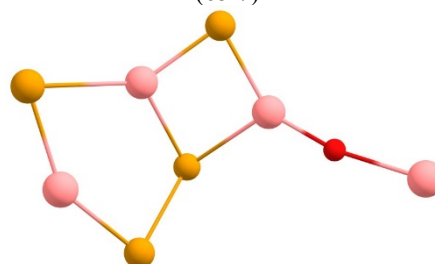

4f ( $C_1$ )  
 $^1A$   
**83.6**

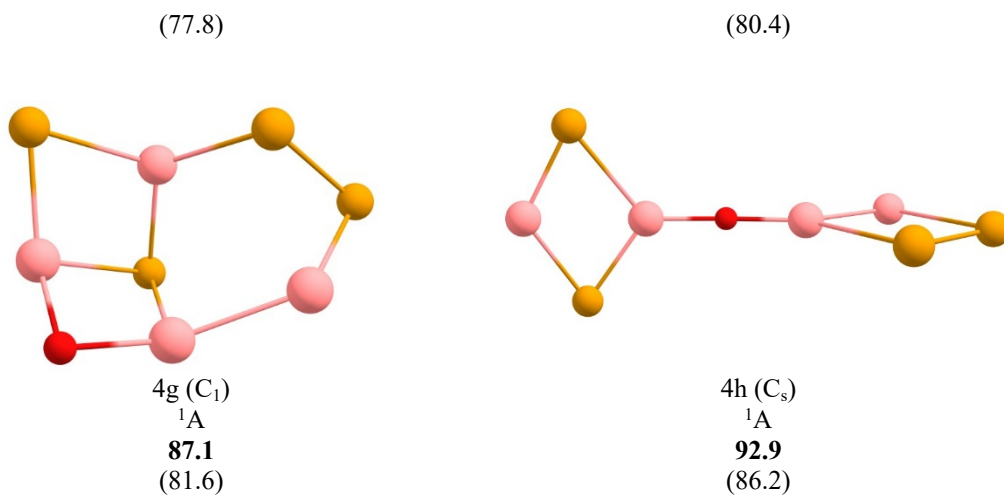

**Fig. S5** Optimized structures within the range of 0-100 kcal.mol<sup>-1</sup> with respect to the global minimum structure of the O@X<sub>4</sub>E<sub>4</sub><sup>2+</sup> cluster (X = Ga; E = Se) at the PBE0-GD3/def2-TZVP level. Relative energies are listed in kcal.mol<sup>-1</sup> at the single-point CCSD(T)/def2-TZVP//PBE0-GD3/def2-TZVP (in bold) an PBE0-GD3/def2-TZVP (in parentheses) levels, with zero-point energy (ZPE) correction.

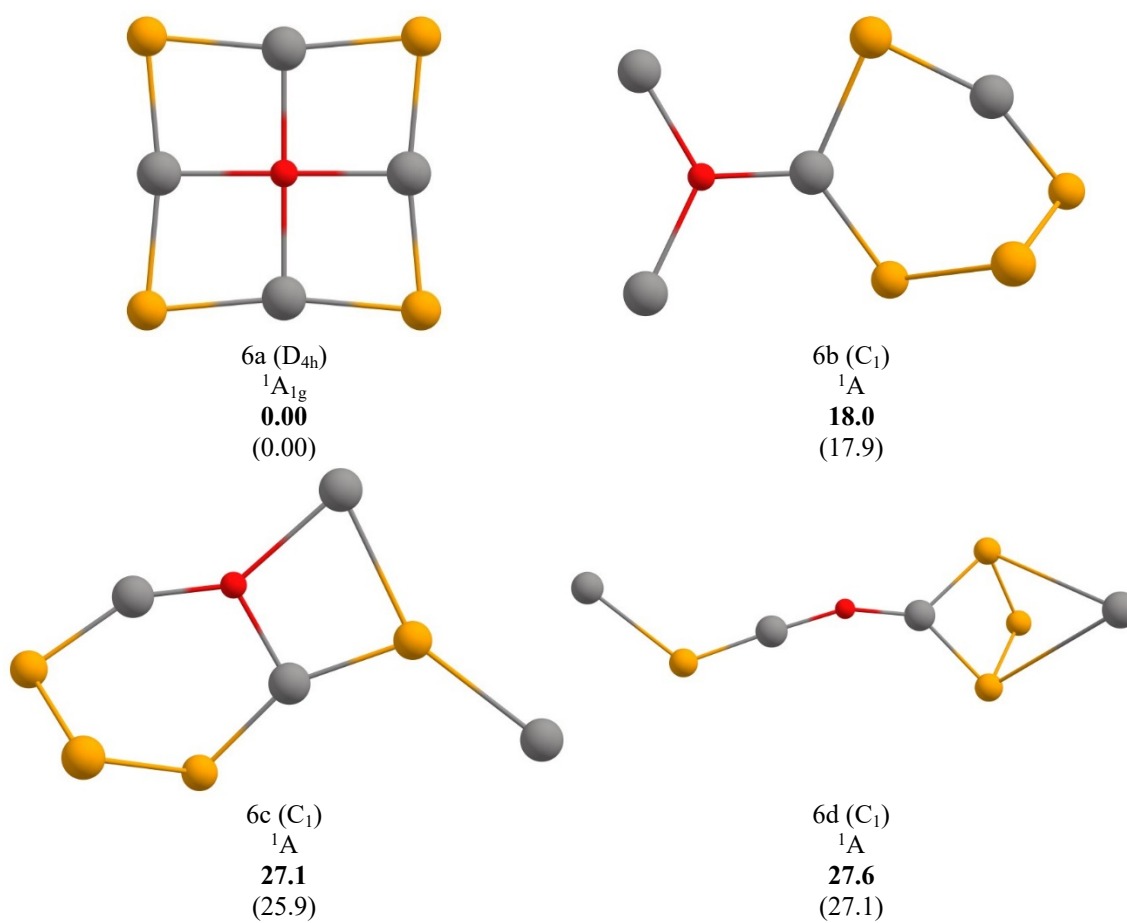

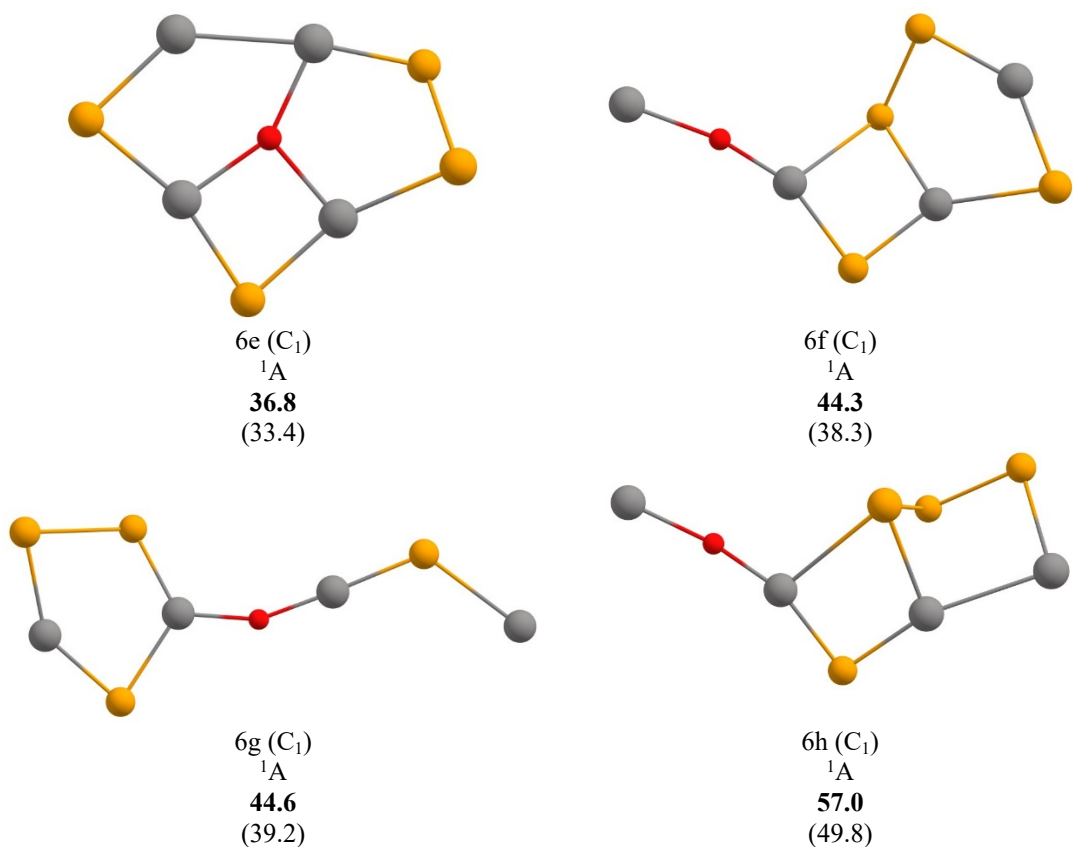

**Fig. S6** Optimized structures within the range of 0-60 kcal.mol<sup>-1</sup> with respect to the global minimum structure of the  $OCX_4E_4^{2+}$  cluster ( $X = In$ ;  $E = Se$ ) at the PBE0-GD3/def2-TZVP level. Relative energies are listed in kcal.mol<sup>-1</sup> at the single-point CCSD(T)/def2-TZVP//PBE0-GD3/def2-TZVP (in bold) an PBE0-GD3/def2-TZVP (in parentheses) levels, with zero-point energy (ZPE) correction.

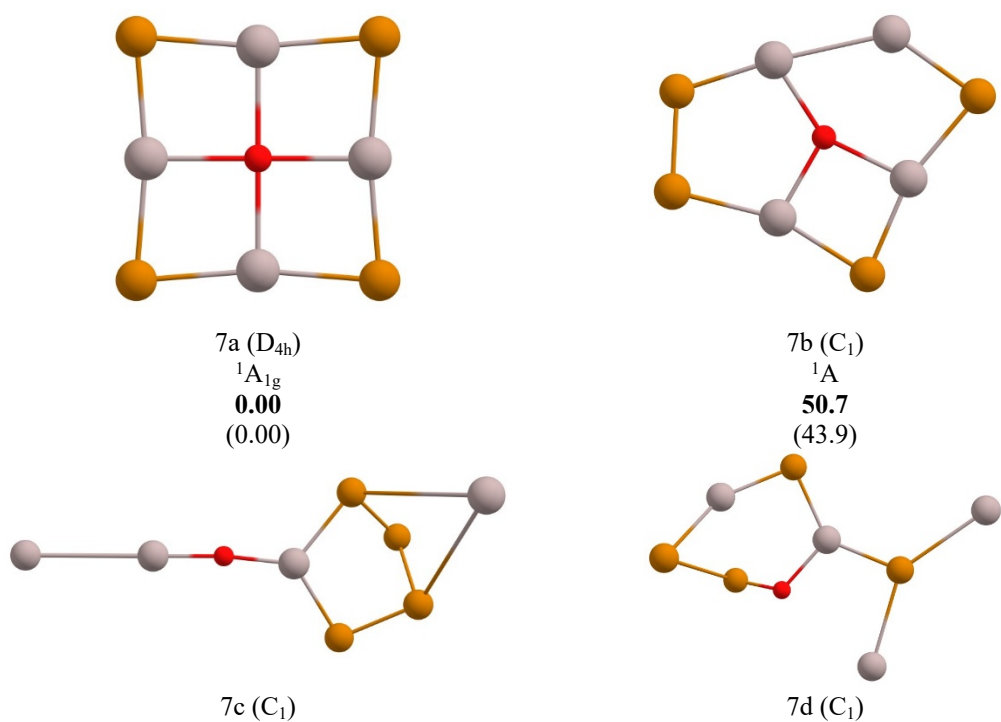

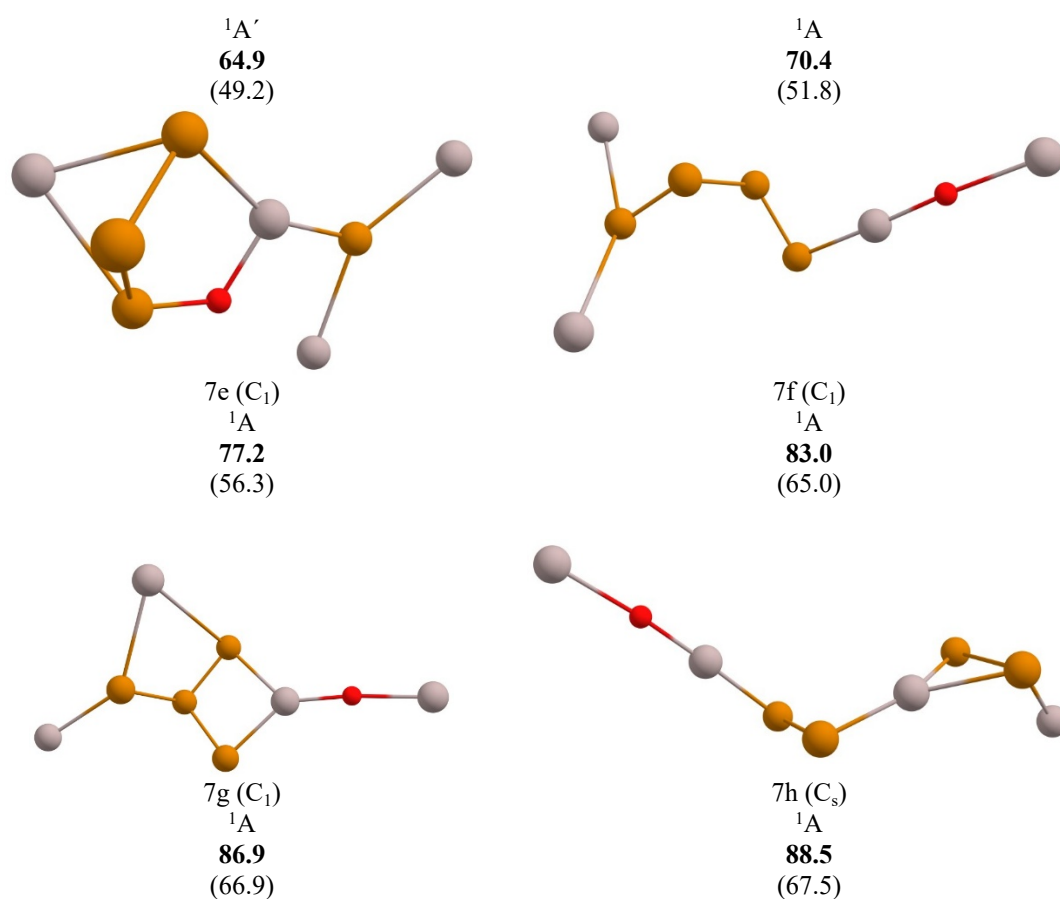

**Fig. S7** Optimized structures within the range of 0-90 kcal.mol<sup>-1</sup> with respect to the global minimum structure of the O@X<sub>4</sub>E<sub>4</sub><sup>2+</sup> cluster (X = Al; E = Te) at the PBE0-GD3/def2-TZVP level. Relative energies are listed in kcal.mol<sup>-1</sup> at the single-point CCSD(T)/def2-TZVP//PBE0-GD3/def2-TZVP (in bold) an PBE0-GD3/def2-TZVP (in parentheses) levels, with zero-point energy (ZPE) correction.

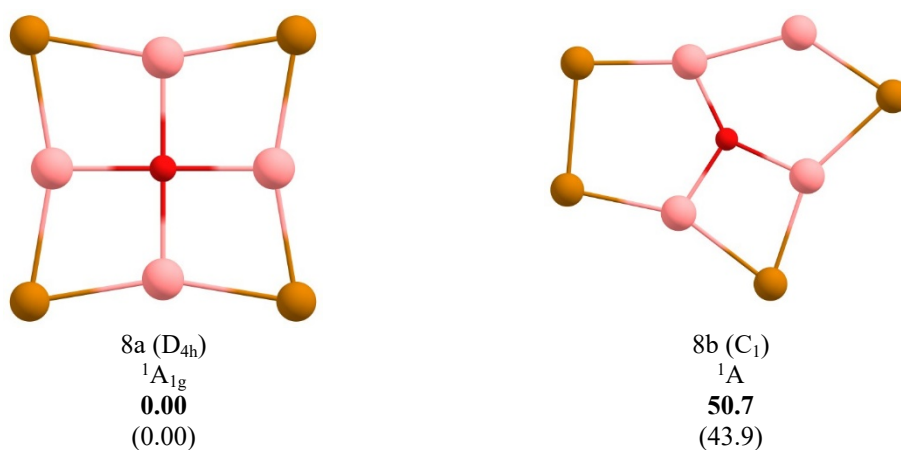

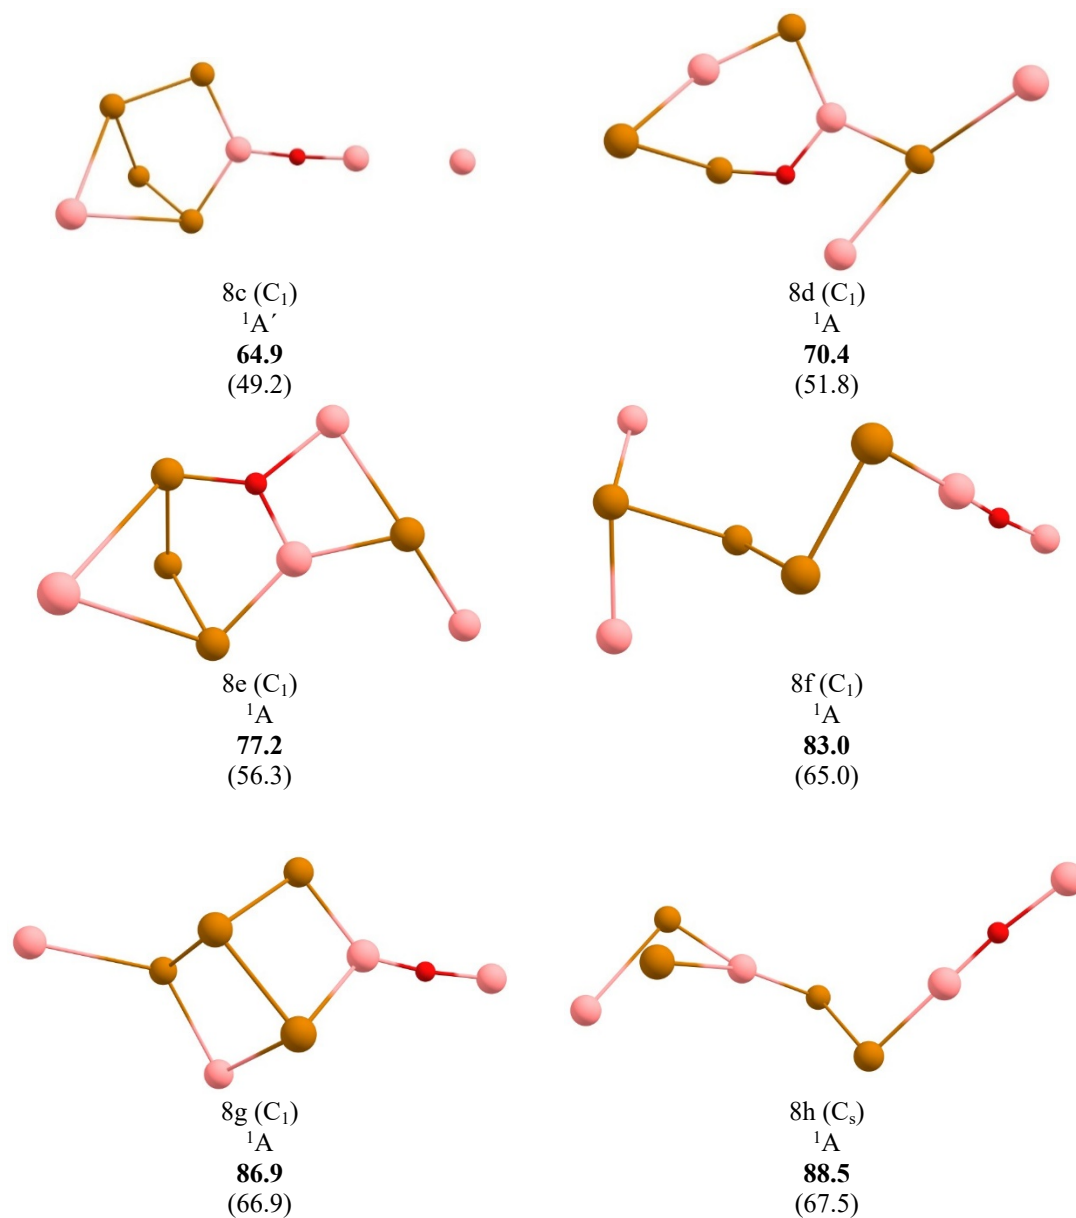

**Fig. S8** Optimized structures within the range of 0-90 kcal.mol<sup>-1</sup> with respect to the global minimum structure of the O@X<sub>4</sub>E<sub>4</sub><sup>2+</sup> cluster (X = Ga; E = Te) at the PBE0-GD3/def2-TZVP level. Relative energies are listed in kcal.mol<sup>-1</sup> at the single-point CCSD(T)/def2-TZVP//PBE0-GD3/def2-TZVP (in bold) an PBE0-GD3/def2-TZVP (in parentheses) levels, with zero-point energy (ZPE) correction.

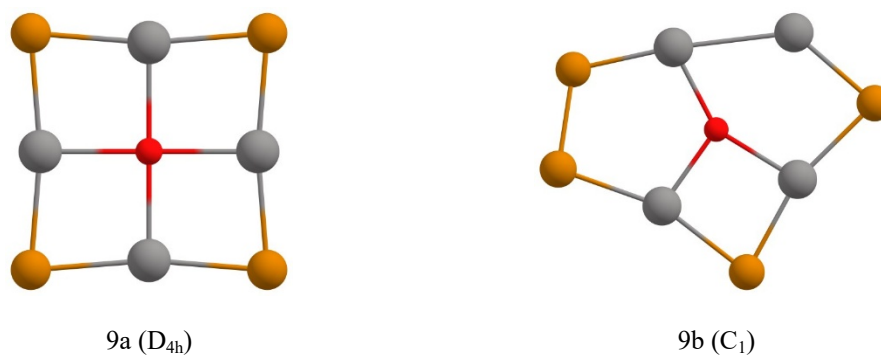

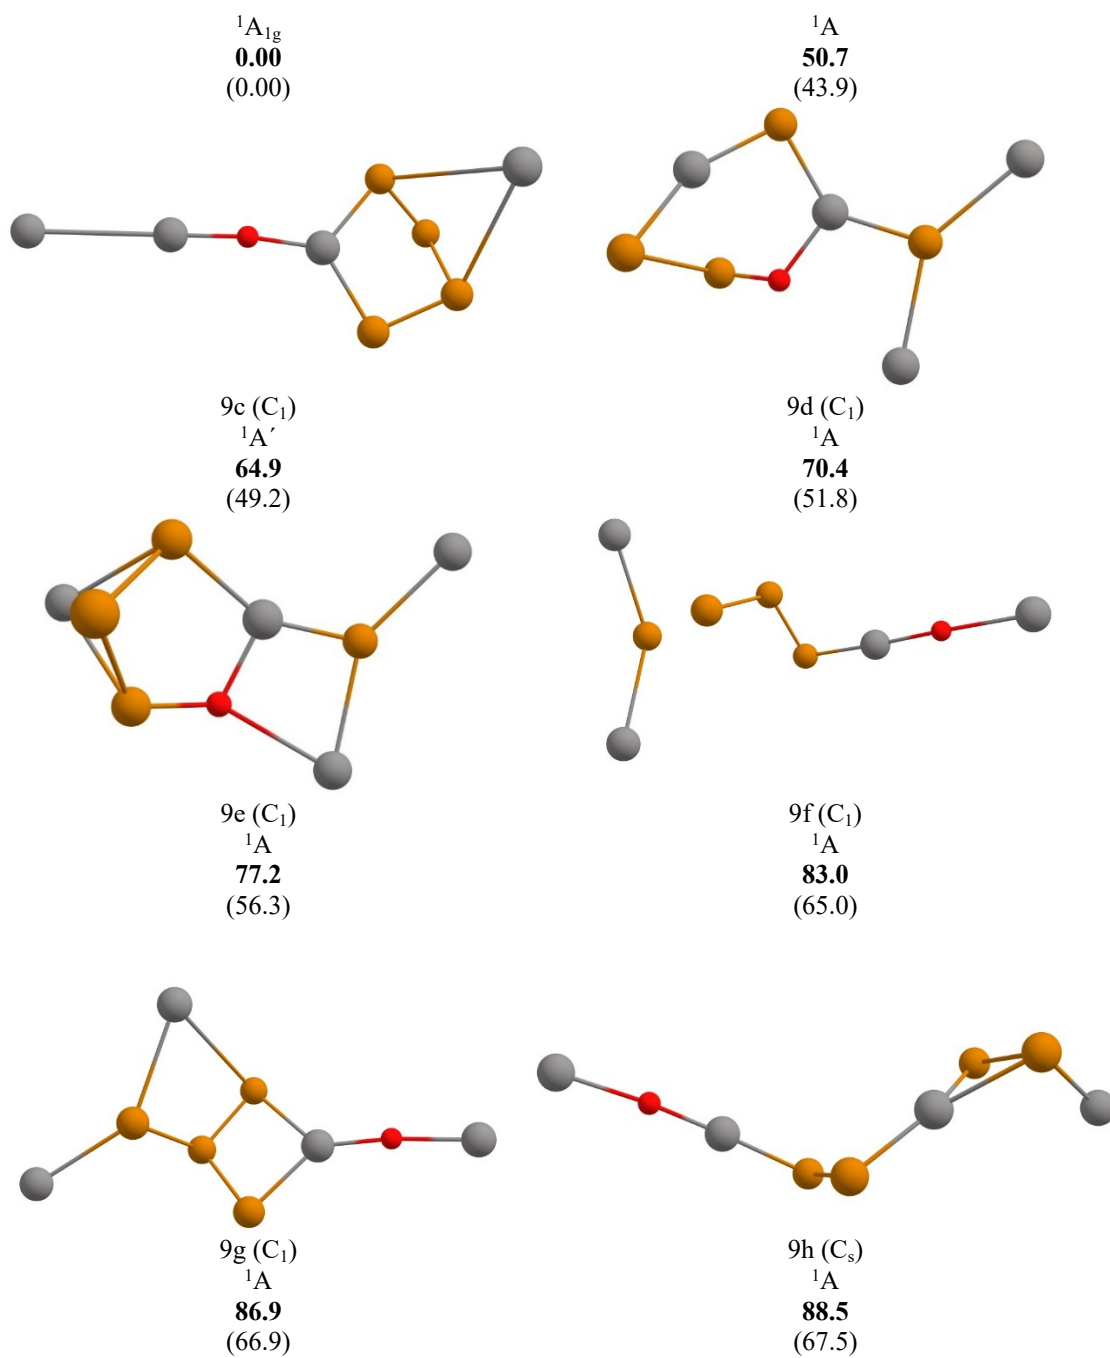

**Fig. S9** Optimized structures within the range of 0-90 kcal.mol<sup>-1</sup> with respect to the global minimum structure of the O@X<sub>4</sub>E<sub>4</sub><sup>2+</sup> cluster (X = In; E = Te) at the PBE0-GD3/def2-TZVP level. Relative energies are listed in kcal.mol<sup>-1</sup> at the single-point CCSD(T)/def2-TZVP//PBE0-GD3/def2-TZVP (in bold) an PBE0-GD3/def2-TZVP (in parentheses) levels, with zero-point energy (ZPE) correction.

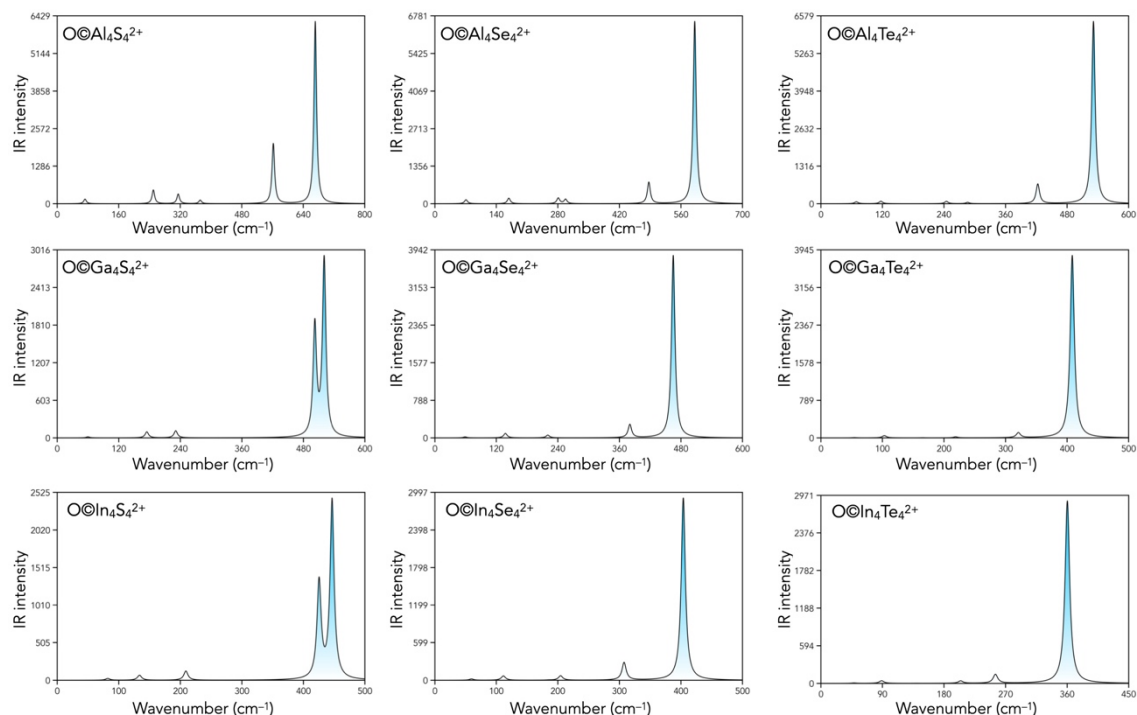

**Figure S10.** IR spectra for the global minimum  $O@X_4E_4^{2+}$  ( $X= Al/Ga/In$ ,  $E= S/Se/Te$ ) PBE0-GD3/def2-TZVP.

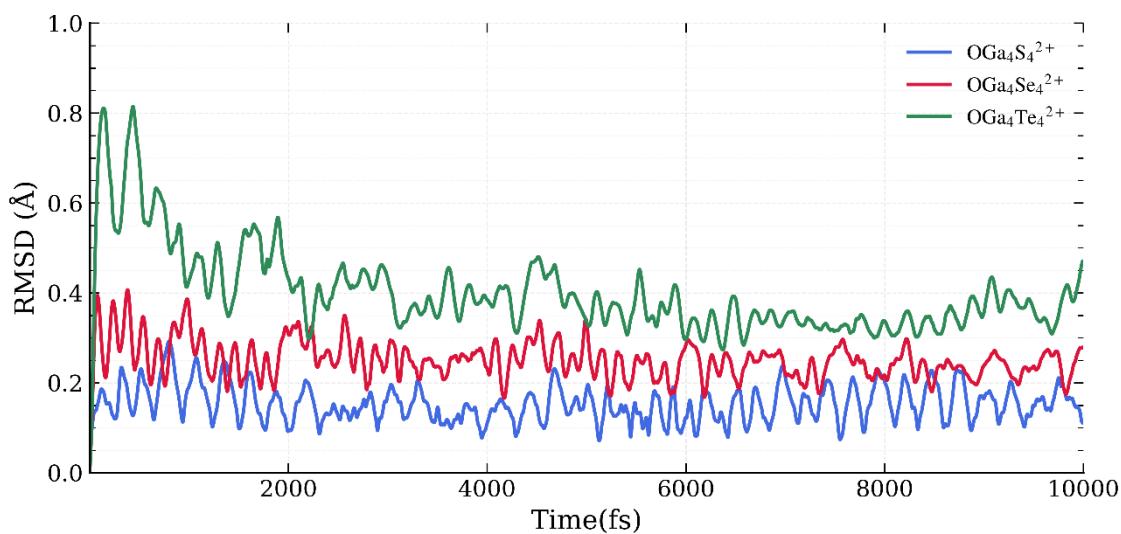

**Figure S11.** RMSD curves along the trajectories of Born-Oppenheimer molecular dynamics for a)  $O@(GaE)_4^{2+}$  systems ( $E= S, Se, Te$ ). The X-axis shows time in femtoseconds(fs), while the Y-axis shows RMSD in angstroms ( $\text{\AA}$ ). Systems E: (Blue =S, red=Se and green=Te). Temperature (500 K).

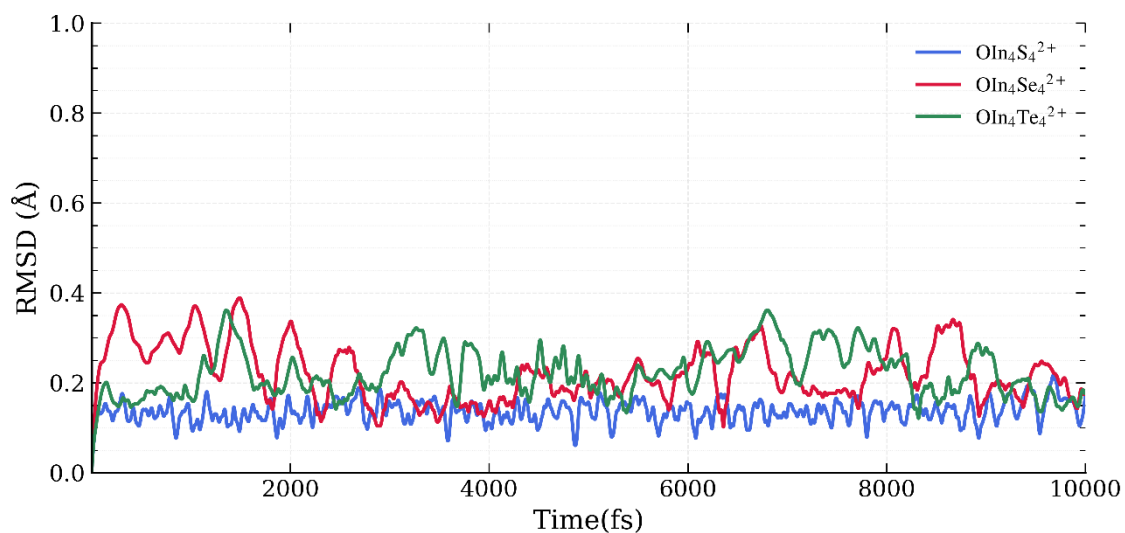

**Figure S12.** RMSD curves along the trajectories of Born-Oppenheimer molecular dynamics for a)  $O\text{O}(\text{InE})_4^{2+}$  systems ( $E= \text{S, Se, Te}$ ). The X-axis shows time in femtoseconds(fs), while the Y-axis shows RMSD in angstroms ( $\text{\AA}$ ). Systems E: (Blue =S, red=Se and green=Te). Temperature (500 K).

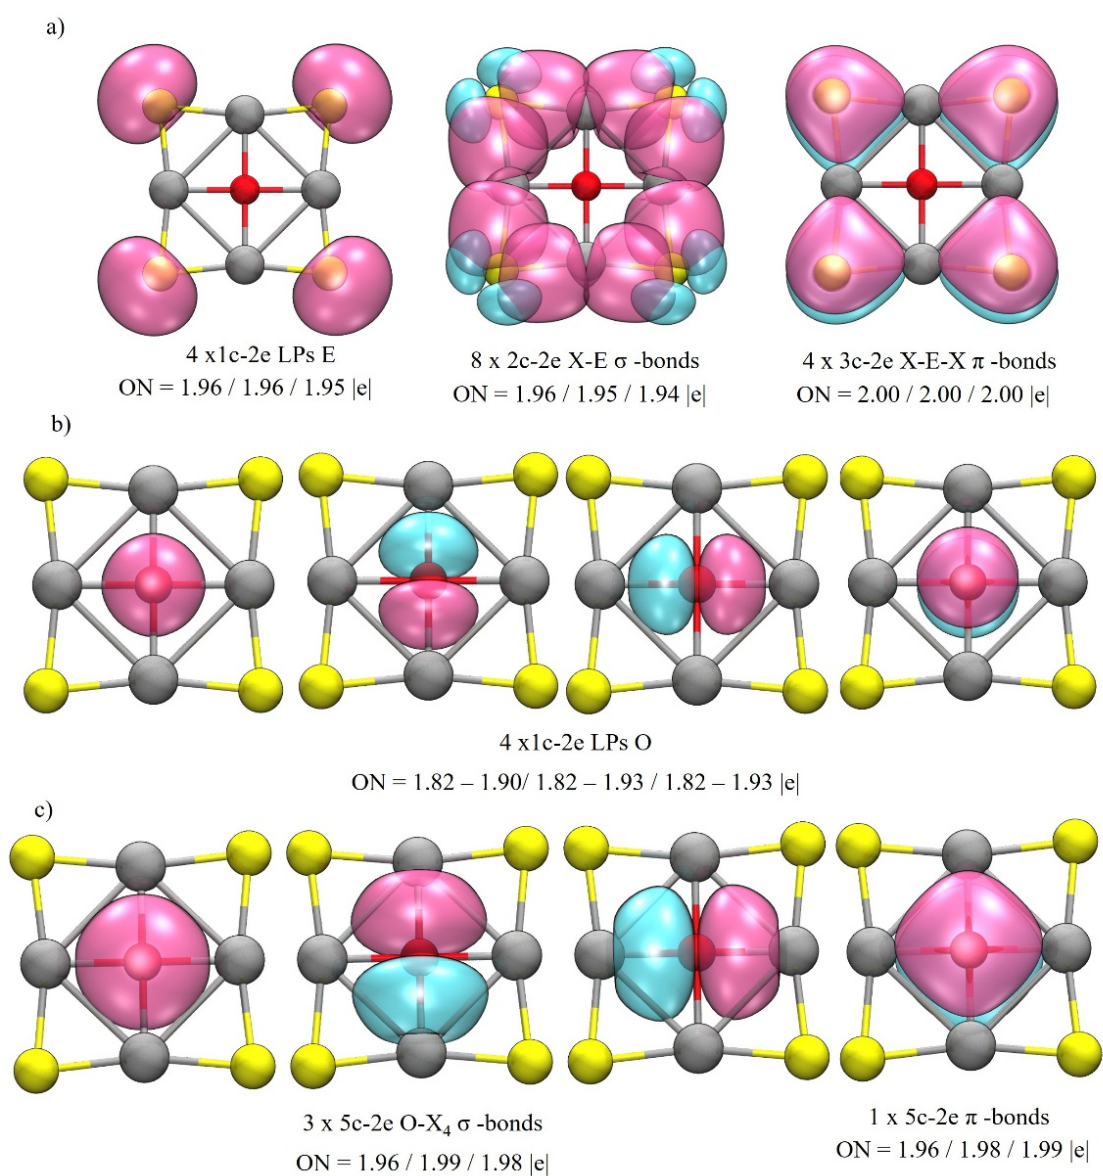

**Figure S13.** AdNDP bonding pattern of  $O^\ominus(AlE)_4^{2+}$  ( $E = S\text{--}Te$ ). a) AdNDP scheme with four 1c-2e E lone pairs, eight 2c-2e Al-E  $\sigma$ -bonds and four 3c-2e Al-E-Al  $\pi$ -bonds. b) Alternative pattern in line with an electrostatic model. c) Alternative pattern in line with delocalized bonding model. Occupation numbers are show.

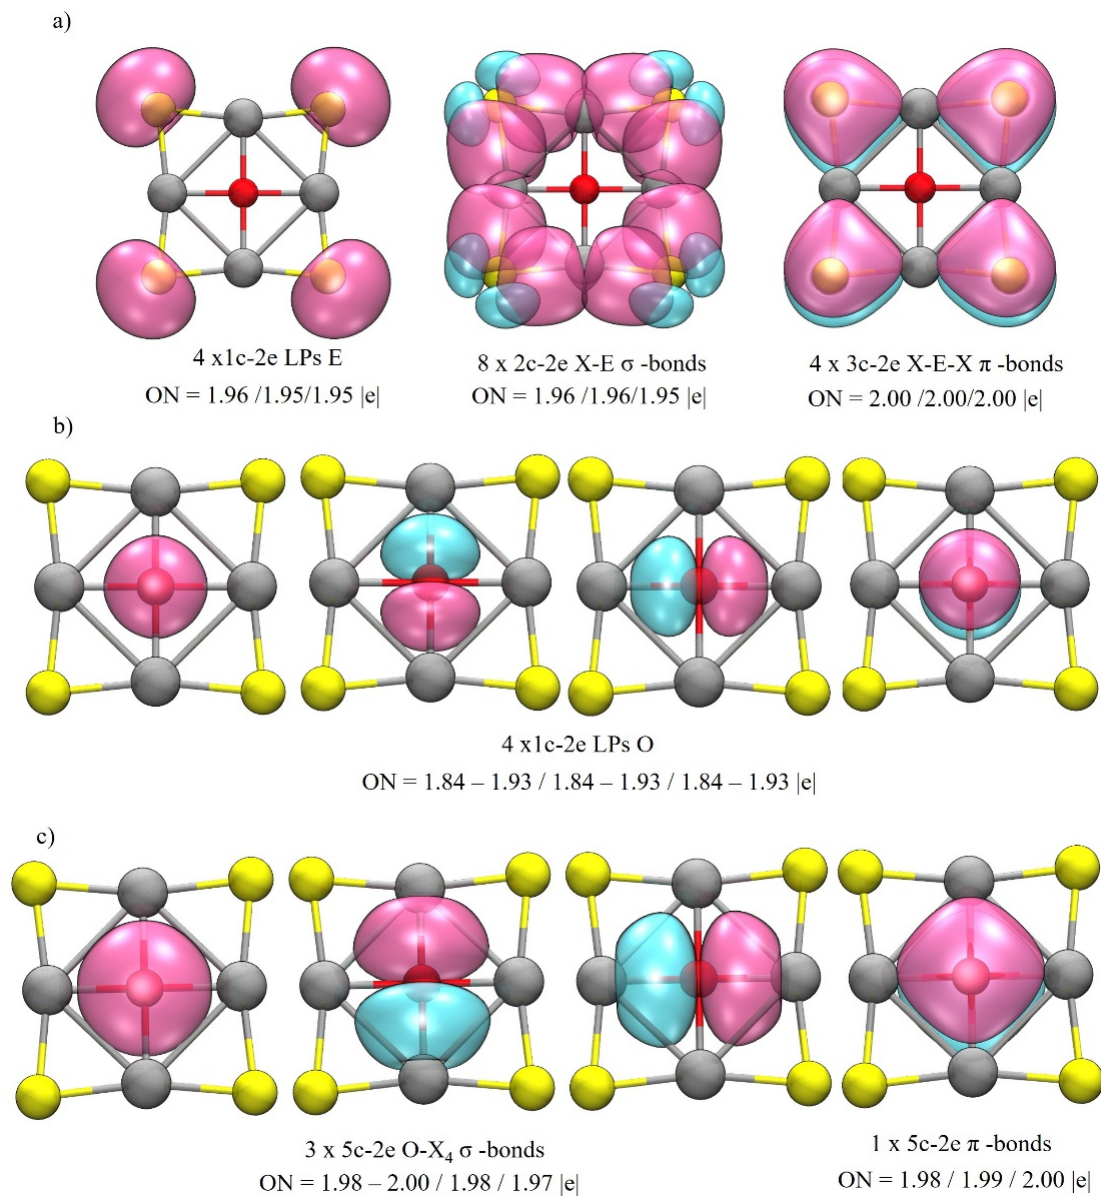

**Figure S14.** AdNDP bonding pattern of  $\text{O}^\ominus(\text{GaE})_4^{2+}$  ( $\text{E} = \text{S}-\text{Te}$ ). a) AdNDP scheme with four 1c-2e E lone pairs, eight 2c-2e Ga-E  $\sigma$ -bonds and four 3c-2e Ga-E-Ga  $\pi$ -bonds. b) Alternative pattern in line with an electrostatic model. c) Alternative pattern in line with delocalized bonding model. Occupation numbers are show.

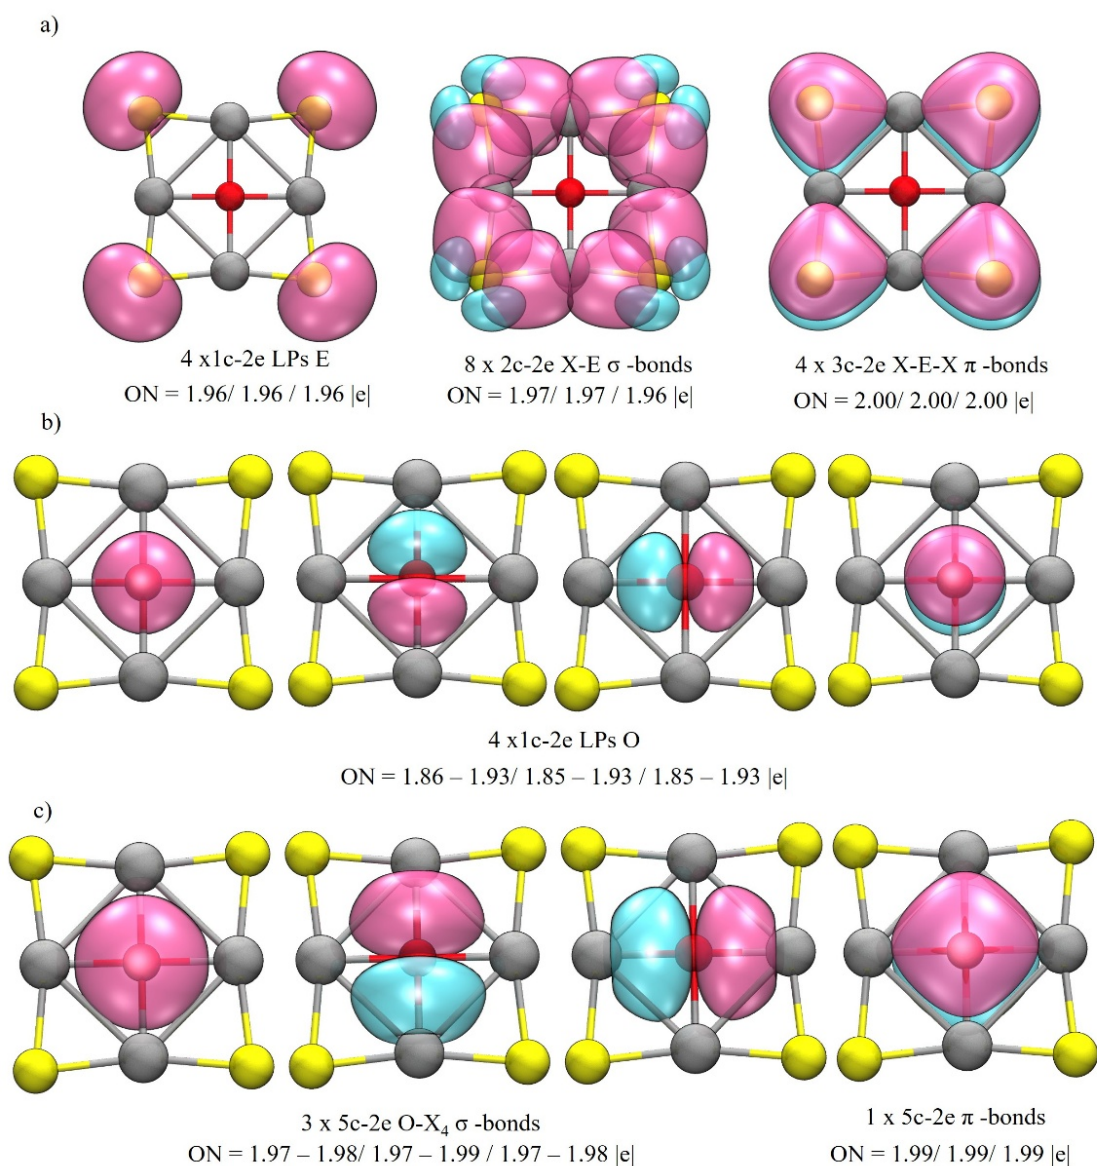

**Figure S15.** AdNDP bonding pattern of  $\text{O}@\text{(InE)}_4^+$  ( $\text{E} = \text{S}-\text{Te}$ ). a) AdNDP scheme with four 1c-2e E lone pairs, eight 2c-2e In-E  $\sigma$ -bonds and four 3c-2e In-E-In  $\pi$ -bonds. b) Alternative pattern in line with an electrostatic model. c) Alternative pattern in line with delocalized bonding model. Occupation numbers are shown.

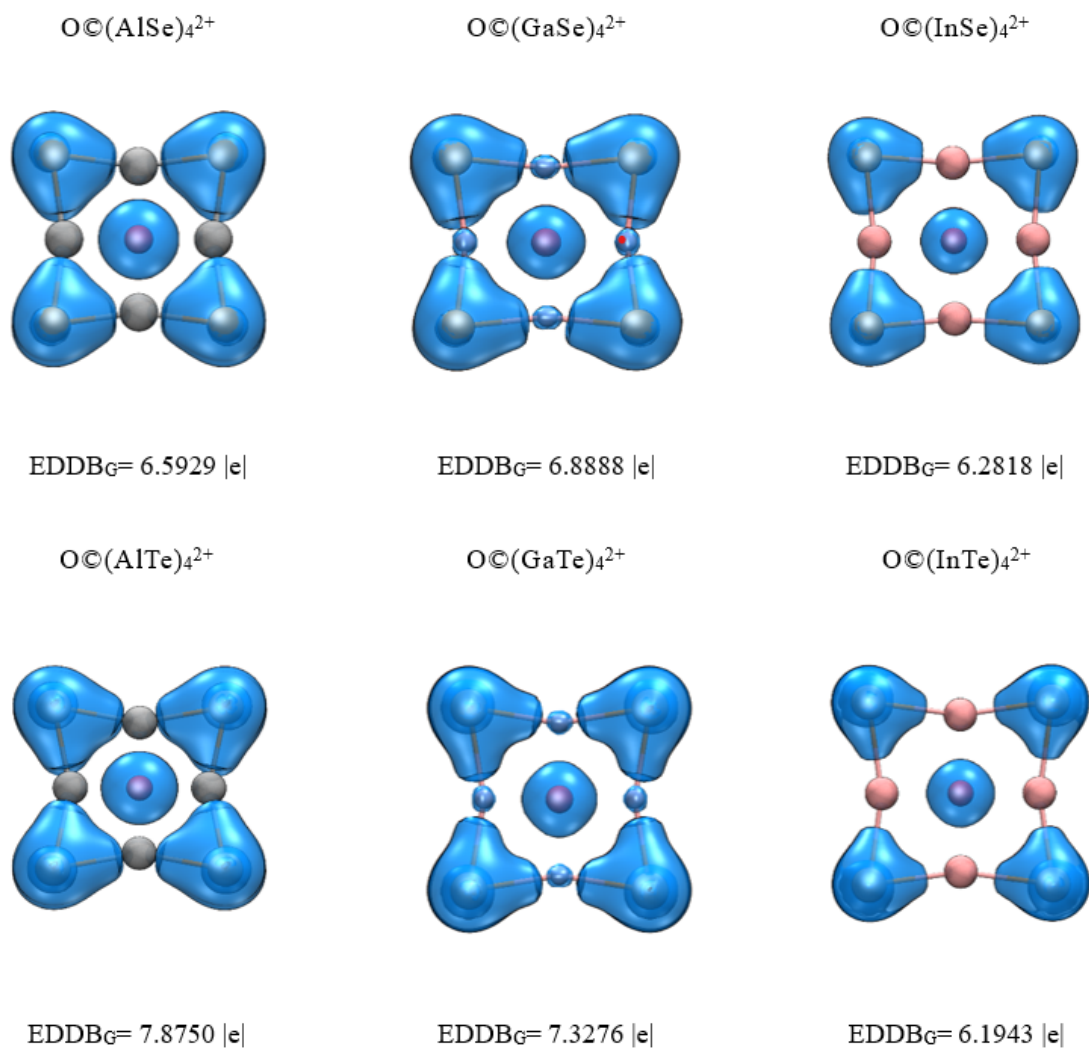

**Figure S16.** Isosurface contour by global EDDB<sub>G</sub> function (isocontour of 0.006 a.u.) with the corresponding population of delocalized electrons for  $\text{O}^\ominus\text{X}_4\text{E}_4^{2+}$  (X= Al/Ga/In, E= Se/Te) for each system at the  $\omega\text{B97XD}/\text{def2-TZVP}$  level.

**Table S1.** Lowest vibrational frequencies ( $\nu$ ,  $\text{cm}^{-1}$ ) for  $D_{4h}\text{-O}\text{C}(\text{XE})_4^{2+}$ , where X represents group 13 elements and E denotes chalcogens at PBE0-GD3/def2-TZVP level.

| System                                 | $\nu_{\min}$ | System                                 | $\nu_{\min}$ | System                                 | $\nu_{\min}$ |
|----------------------------------------|--------------|----------------------------------------|--------------|----------------------------------------|--------------|
| $\text{O}\text{C}(\text{BO})_4^{2+}$   | -462.2       | $\text{O}\text{C}(\text{AlO})_4^{2+}$  | -190.6       | $\text{O}\text{C}(\text{GaO})_4^{2+}$  | -163.9       |
| $\text{O}\text{C}(\text{BS})_4^{2+}$   | -194.3       | $\text{O}\text{C}(\text{AlS})_4^{2+}$  | 67.8         | $\text{O}\text{C}(\text{GaS})_4^{2+}$  | 59.8         |
| $\text{O}\text{C}(\text{BSe})_4^{2+}$  | -123.9       | $\text{O}\text{C}(\text{AlSe})_4^{2+}$ | 35.9         | $\text{O}\text{C}(\text{GaSe})_4^{2+}$ | 32.6         |
| $\text{O}\text{C}(\text{BTe})_4^{2+}$  | -139.5       | $\text{O}\text{C}(\text{AlTe})_4^{2+}$ | 20.4         | $\text{O}\text{C}(\text{GaTe})_4^{2+}$ | 17.7         |
| $\text{O}\text{C}(\text{BPO})_4^{2+}$  | -156.6       | $\text{O}\text{C}(\text{AlPO})_4^{2+}$ | 13.8         | $\text{O}\text{C}(\text{GaPO})_4^{2+}$ | 11.5         |
| System                                 | $\nu_{\min}$ | System                                 | $\nu_{\min}$ |                                        |              |
| $\text{O}\text{C}(\text{InO})_4^{2+}$  | -41.3        | $\text{O}\text{C}(\text{TlO})_4^{2+}$  | 19.4         |                                        |              |
| $\text{O}\text{C}(\text{InS})_4^{2+}$  | 45.1         | $\text{O}\text{C}(\text{TlS})_4^{2+}$  | 38.8         |                                        |              |
| $\text{O}\text{C}(\text{InSe})_4^{2+}$ | 27.4         | $\text{O}\text{C}(\text{TlSe})_4^{2+}$ | 23.5         |                                        |              |
| $\text{O}\text{C}(\text{InTe})_4^{2+}$ | 15.3         | $\text{O}\text{C}(\text{TlTe})_4^{2+}$ | 11.1         |                                        |              |
| $\text{O}\text{C}(\text{InPO})_4^{2+}$ | 10.0         | $\text{O}\text{C}(\text{TlPO})_4^{2+}$ | 6.3          |                                        |              |

**Table S2.** HOMO-LUMO energy gaps, singlet-triplet energy differences, smallest vibrational frequencies, T1-diagnostics for the global minimum  $\text{O}\text{C}\text{X}_4\text{E}_4^{2+}$  (X= Al/Ga/In, E= S/Se/Te).

| System                                 | $\Delta E_{\text{H-L}}$ (eV) | $\Delta E_{\text{S-T}}$ (kcal/mol) | T <sub>1</sub> Diagnostic |
|----------------------------------------|------------------------------|------------------------------------|---------------------------|
| $\text{O}\text{C}(\text{AlS})_4^{2+}$  | 5.5                          | 63.9                               | 0.008                     |
| $\text{O}\text{C}(\text{AlSe})_4^{2+}$ | 5.2                          | 85.7                               | 0.009                     |
| $\text{O}\text{C}(\text{AlTe})_4^{2+}$ | 4.8                          | 82.3                               | 0.006                     |
| $\text{O}\text{C}(\text{GaS})_4^{2+}$  | 5.1                          | 57.7                               | 0.009                     |
| $\text{O}\text{C}(\text{GaSe})_4^{2+}$ | 4.8                          | 84.0                               | 0.006                     |
| $\text{O}\text{C}(\text{GaTe})_4^{2+}$ | 4.0                          | 76.5                               | 0.010                     |
| $\text{O}\text{C}(\text{InS})_4^{2+}$  | 4.5                          | 72.0                               | 0.011                     |
| $\text{O}\text{C}(\text{InSe})_4^{2+}$ | 4.3                          | 73.1                               | 0.008                     |
| $\text{O}\text{C}(\text{InTe})_4^{2+}$ | 3.8                          | 64.9                               | 0.010                     |

**Table S3.** Energy components of IQA for the  $D_{4h}\text{-O}\text{C}(\text{XE})_4^{2+}$  systems (X=Al-In and E=S-Te);  $V_{\text{IQA}}^{\text{int}}$ ,  $V_c^{\text{int}}$ , and  $V_{\text{XC}}^{\text{int}}$  are interatomic IQA interaction energy and their coulombic and exchange-correlation energy components, respectively, in kcal/mol.

|                         | $\text{O}\text{C}(\text{AlS})_4^{2+}$ | $\text{O}\text{C}(\text{GaS})_4^{2+}$ | $\text{O}\text{C}(\text{InS})_4^{2+}$ |
|-------------------------|---------------------------------------|---------------------------------------|---------------------------------------|
| $\Delta E_{\text{IQA}}$ | 0.0                                   | 0.0                                   | 0.0                                   |

|                       |                                                      |                                                      |                                                      |
|-----------------------|------------------------------------------------------|------------------------------------------------------|------------------------------------------------------|
| $V_{IQA}^{int}$ (O-X) | -744.2                                               | -426.2                                               | -348.2                                               |
| $V_C^{int}$ (O-X)     | -714.9                                               | -368.4                                               | -291.7                                               |
| $V_{XC}^{int}$ (O-X)  | -29.2                                                | -57.8                                                | -56.6                                                |
| $\delta$ (O-X)        | 0.196                                                | 0.390                                                | 1.061                                                |
| $V_{IQA}^{int}$ (X-X) | 661.2                                                | 280.8                                                | 215.8                                                |
| $V_C^{int}$ (X-X)     | 662.0                                                | 285.0                                                | 221.2                                                |
| $V_{XC}^{int}$ (X-X)  | -0.8                                                 | -4.2                                                 | -5.4                                                 |
| $\delta$ (X-X)        | 0.011                                                | 0.048                                                | 0.062                                                |
| $V_{IQA}^{int}$ (E-X) | -665.5                                               | -294.1                                               | -239.9                                               |
| $V_C^{int}$ (E-X)     | -598.1                                               | -170.3                                               | -117.4                                               |
| $V_{XC}^{int}$ (E-X)  | -67.4                                                | -123.8                                               | -122.5                                               |
| $\delta$ (E-X)        | 0.538                                                | 0.961                                                | 1.003                                                |
|                       | <b>O<math>\odot</math>(AlSe)<math>_4^{2+}</math></b> | <b>O<math>\odot</math>(GaSe)<math>_4^{2+}</math></b> | <b>O<math>\odot</math>(InSe)<math>_4^{2+}</math></b> |
| $\Delta E_{IQA}$      | 0.0                                                  | 0.0                                                  | 0.0                                                  |
| $V_{IQA}^{int}$ (O-X) | -719.6                                               | -388.1                                               | -318.1                                               |
| $V_C^{int}$ (O-X)     | -689.3                                               | -329.6                                               | -261.6                                               |
| $V_{XC}^{int}$ (O-X)  | -30.3                                                | -58.5                                                | -56.5                                                |
| $\delta$ (O-X)        | 0.21                                                 | 0.40                                                 | 0.12                                                 |
| $V_{IQA}^{int}$ (X-X) | 606.7                                                | 219.4                                                | 169.3                                                |
| $V_C^{int}$ (X-X)     | 607.7                                                | 224.6                                                | 175.8                                                |
| $V_{XC}^{int}$ (X-X)  | -1                                                   | -5.2                                                 | -6.5                                                 |
| $\delta$ (X-X)        | 0.01                                                 | 0.06                                                 | 0.12                                                 |
| $V_{IQA}^{int}$ (E-X) | -603.3                                               | -230.1                                               | -192                                                 |
| $V_C^{int}$ (E-X)     | -532.6                                               | -106.3                                               | -71.1                                                |
| $V_{XC}^{int}$ (E-X)  | -70.7                                                | -123.9                                               | -120.9                                               |
| $\delta$ (E-X)        | 0.59                                                 | 1.00                                                 | 1.03                                                 |
|                       | <b>O<math>\odot</math>(AlTe)<math>_4^{2+}</math></b> | <b>O<math>\odot</math>(GaTe)<math>_4^{2+}</math></b> | <b>O<math>\odot</math>(InTe)<math>_4^{2+}</math></b> |
| $\Delta E_{IQA}$      | 0.0                                                  | 0.0                                                  | 0.0                                                  |
| $V_{IQA}^{int}$ (O-X) | -678.8                                               | -328                                                 | -274.2                                               |
| $V_C^{int}$ (O-X)     | -646.4                                               | -268.5                                               | -217.6                                               |

|                       |       |        |        |
|-----------------------|-------|--------|--------|
| $V_{XC}^{int}$ (O-X)  | -32.4 | -59.5  | -56.6  |
| $\delta$ (O-X)        | 0.68  | 0.42   | 0.01   |
| $V_{IQA}^{int}$ (X-X) | 520   | 134.7  | 108.6  |
| $V_C^{int}$ (X-X)     | 521.4 | 142.3  | 117.1  |
| $V_{XC}^{int}$ (X-X)  | -1.4  | -7.5   | -8.4   |
| $\delta$ (X-X)        | 0.003 | 0.08   | 0.14   |
| $V_{IQA}^{int}$ (E-X) | -56.8 | -152.1 | -136.5 |
| $V_C^{int}$ (E-X)     | -430  | -29.4  | -19    |
| $V_{XC}^{int}$ (E-X)  | -76.8 | -122.8 | -117.6 |
| $\delta$ (E-X)        | 0.26  | 1.06   | 1.07   |

## Cartesian Coordinates

Cartesian Coordinates of the  $O\odot X_4E_4^{2+}$  (X = Al; E = S) clusters calculated at the PBE0-GD3/def2-TZVP level of theory.

| 1a |               |              |              | 1b |               |              |              |
|----|---------------|--------------|--------------|----|---------------|--------------|--------------|
| S  | 2.232221000   | 2.232221000  | 0.000000000  | S  | 0.288000000   | 3.134110000  | 0.043833000  |
| S  | -2.232221000  | -2.232221000 | 0.000000000  | S  | -0.330869000  | -3.126478000 | 0.012158000  |
| Al | 0.000000000   | 1.995835000  | 0.000000000  | Al | 1.583158000   | 1.280060000  | -0.031631000 |
| S  | 2.232221000   | -2.232221000 | 0.000000000  | Al | -1.551029000  | -1.260676000 | 0.061869000  |
| S  | -2.232221000  | 2.232221000  | 0.000000000  | O  | 0.024721000   | 0.013698000  | 0.015812000  |
| Al | 0.000000000   | -1.995835000 | 0.000000000  | Al | -1.254281000  | 1.519597000  | -0.034081000 |
| Al | 1.995835000   | 0.000000000  | 0.000000000  | Al | 1.239409000   | -1.517679000 | -0.041236000 |
| O  | 0.000000000   | 0.000000000  | 0.000000000  | S  | -3.133359000  | 0.317583000  | -0.032236000 |
| Al | -1.995835000  | 0.000000000  | 0.000000000  | S  | 3.149845000   | -0.349371000 | 0.004967000  |
| 1c |               |              |              | 1d |               |              |              |
| Al | -27.688771000 | 0.137568000  | -0.345665000 | Al | -27.101860000 | -0.037132000 | -0.084990000 |
| Al | 3.915173000   | -0.877330000 | -1.267211000 | S  | 5.605361000   | 0.950349000  | -0.683888000 |
| S  | 2.703891000   | 2.538689000  | 1.508810000  | S  | 5.635893000   | -1.304913000 | -0.127372000 |
| Al | 3.809617000   | 1.901030000  | -0.419259000 | Al | 3.618035000   | 1.595416000  | 0.232493000  |
| Al | 2.196875000   | 0.258196000  | 1.337478000  | Al | 3.417565000   | -1.675382000 | 0.271938000  |
| O  | 3.093581000   | 0.256428000  | -0.186446000 | Al | 1.171230000   | 0.164592000  | 0.252193000  |
| S  | 1.930880000   | -1.999922000 | 1.526354000  | S  | 1.173028000   | -2.095920000 | -0.169862000 |
| S  | 3.156542000   | -2.792440000 | -0.281500000 | S  | 1.440586000   | 2.412390000  | 0.066565000  |
| S  | 5.097671000   | 0.972144000  | -2.096033000 | O  | 2.994686000   | -0.000989000 | 0.737707000  |

**Table S4.** Cartesian Coordinates of the  $O\odot X_4E_4^{2+}$  (X = Ga; E = S) clusters calculated at the PBE0-GD3/def2-TZVP level of theory.

| 2a |             |              |              | 2b |              |              |             |
|----|-------------|--------------|--------------|----|--------------|--------------|-------------|
| S  | 1.209228000 | -1.577620000 | 0.628960000  | S  | 2.257123000  | 2.257123000  | 0.000000000 |
| Ga | 5.509676000 | 0.320994000  | -0.383242000 | S  | -2.257123000 | -2.257123000 | 0.000000000 |
| O  | 4.008492000 | 0.000415000  | 0.809233000  | Ga | 0.000000000  | 2.076253000  | 0.000000000 |

|           |               |              |              |           |               |              |              |
|-----------|---------------|--------------|--------------|-----------|---------------|--------------|--------------|
| S         | 5.424553000   | -1.902958000 | -1.024006000 | S         | 2.257123000   | -2.257123000 | 0.000000000  |
| Ga        | 2.982575000   | 1.558217000  | 0.472167000  | S         | -2.257123000  | 2.257123000  | 0.000000000  |
| Ga        | 3.476011000   | -1.747269000 | 0.263165000  | Ga        | 0.000000000   | -2.076253000 | 0.000000000  |
| S         | 4.886802000   | 2.533514000  | -0.511983000 | Ga        | 2.076253000   | 0.000000000  | 0.000000000  |
| S         | 0.910405000   | 0.620179000  | 0.087254000  | O         | 0.000000000   | 0.000000000  | 0.000000000  |
| Ga        | -19.418705000 | 0.036666000  | -0.137814000 | Ga        | -2.076253000  | 0.000000000  | 0.000000000  |
| <b>2c</b> |               |              |              | <b>2d</b> |               |              |              |
| S         | -2.875538000  | -2.682025000 | 0.679913000  | S         | -0.616861000  | -0.703629000 | 1.094258000  |
| Ga        | -2.414811000  | 1.786352000  | -0.121178000 | Ga        | 1.193300000   | -1.583551000 | -0.010673000 |
| S         | -3.607057000  | 1.601332000  | 1.906132000  | Ga        | 1.691651000   | 1.711563000  | -0.078596000 |
| Ga        | -3.696115000  | -0.580868000 | 1.159936000  | Ga        | -10.579361000 | -0.042028000 | -0.229372000 |
| Ga        | 12.385207000  | -0.076919000 | 0.473559000  | Ga        | 3.898068000   | -0.272425000 | -0.426000000 |
| Ga        | -1.862168000  | -1.412404000 | -0.982144000 | S         | 3.431021000   | -2.458400000 | 0.108637000  |
| O         | -3.020353000  | 0.033659000  | -0.564131000 | S         | -0.480644000  | 1.548314000  | 0.599487000  |
| S         | -0.498198000  | 1.916489000  | -1.405875000 | S         | 4.041570000   | 1.980008000  | 0.044995000  |
| S         | -0.057499000  | -0.302688000 | -1.925314000 | O         | 1.960655000   | -0.010129000 | -0.809271000 |

**Table S5.** Cartesian Coordinates of the  $\text{O}@\text{X}_4\text{E}_4^{2+}$  ( $\text{X} = \text{In}$ ;  $\text{E} = \text{S}$ ) clusters calculated at the PBE0-GD3/def2-TZVP level of theory.

|           |              |              |              |           |               |              |              |
|-----------|--------------|--------------|--------------|-----------|---------------|--------------|--------------|
| <b>3a</b> |              |              |              | <b>3b</b> |               |              |              |
| S         | 2.390760000  | 2.390760000  | 0.000000000  | In        | 2.141370000   | -4.806382000 | -0.029436000 |
| S         | -2.390760000 | -2.390760000 | 0.000000000  | In        | -14.586017000 | 0.393810000  | 0.124231000  |
| In        | 0.000000000  | 2.223940000  | 0.000000000  | S         | 3.004531000   | -2.416856000 | -0.839900000 |
| S         | 2.390760000  | -2.390760000 | 0.000000000  | S         | 2.903468000   | 4.420333000  | -0.857349000 |
| S         | -2.390760000 | 2.390760000  | 0.000000000  | In        | 3.552599000   | -0.390054000 | 0.100050000  |
| In        | 0.000000000  | -2.223940000 | 0.000000000  | In        | 4.057499000   | 2.835599000  | 0.579384000  |
| In        | 2.223940000  | 0.000000000  | 0.000000000  | O         | 2.920392000   | 1.461627000  | -0.587157000 |
| O         | 0.000000000  | 0.000000000  | 0.000000000  | S         | 4.987558000   | 0.927142000  | 1.677297000  |
| In        | -2.223940000 | 0.000000000  | 0.000000000  | S         | 2.450052000   | 2.362585000  | -2.057545000 |
| <b>3c</b> |              |              |              | <b>3d</b> |               |              |              |
| In        | 15.496422000 | -0.937801000 | -0.106503000 | In        | 11.259063000  | 0.673299000  | 0.566215000  |
| S         | 0.662106000  | 1.388152000  | 0.723594000  | In        | -5.315034000  | 2.685860000  | 0.693627000  |
| In        | -1.327872000 | 2.458184000  | -0.193294000 | In        | -2.913904000  | -2.584792000 | 1.160433000  |
| In        | -6.708561000 | -3.315988000 | -0.162970000 | S         | -3.775449000  | 0.448526000  | 0.499011000  |
| O         | -1.995954000 | 0.415408000  | -0.090892000 | S         | -0.033861000  | -2.502868000 | -1.238090000 |
| S         | -5.608156000 | -0.984393000 | -0.017292000 | S         | -0.235594000  | 0.655730000  | -2.555319000 |
| In        | -4.074592000 | 0.698624000  | 0.018082000  | S         | 1.212028000   | -0.702087000 | -1.400926000 |
| S         | -3.612601000 | 3.106529000  | -0.373942000 | O         | -1.354069000  | -1.735164000 | -0.219509000 |
| S         | -0.811153000 | -0.358486000 | 1.074937000  | In        | -1.884032000  | 0.194868000  | -0.851269000 |

**Table S6.** Cartesian Coordinates of the  $\text{O}@\text{X}_4\text{E}_4^{2+}$  ( $\text{X} = \text{Al}$ ;  $\text{E} = \text{Se}$ ) clusters calculated at the PBE0-GD3/def2-TZVP level of theory.

|           |              |              |             |           |              |              |             |
|-----------|--------------|--------------|-------------|-----------|--------------|--------------|-------------|
| <b>4a</b> |              |              |             | <b>4b</b> |              |              |             |
| Se        | 2.144664000  | -2.144664000 | 0.000000000 | Se        | 2.144583000  | 2.144583000  | 0.000000000 |
| Al        | 0.000000000  | 1.922328000  | 0.000000000 | Se        | -2.144583000 | -2.144583000 | 0.000000000 |
| Al        | 0.000000000  | -1.922328000 | 0.000000000 | Al        | 0.000000000  | 1.922119000  | 0.000000000 |
| Se        | 2.144664000  | 2.144664000  | 0.000000000 | Se        | 2.144583000  | -2.144583000 | 0.000000000 |
| Se        | -2.144664000 | -2.144664000 | 0.000000000 | Se        | -2.144583000 | 2.144583000  | 0.000000000 |
| Se        | -2.144664000 | 2.144664000  | 0.000000000 | Al        | 0.000000000  | -1.922119000 | 0.000000000 |
| Al        | 1.922328000  | 0.000000000  | 0.000000000 | Al        | 1.922119000  | 0.000000000  | 0.000000000 |
| O         | 0.000000000  | 0.000000000  | 0.000000000 | O         | 0.000000000  | 0.000000000  | 0.000000000 |
| Al        | -1.922328000 | 0.000000000  | 0.000000000 | Al        | -1.922119000 | 0.000000000  | 0.000000000 |
| <b>4c</b> |              |              |             | <b>4d</b> |              |              |             |
| Se        | 0.860941000  | -3.697829000 | 0.000000000 | Se        | 1.392523000  | -2.714640000 | 0.000000000 |
| Al        | -1.595248000 | 2.919669000  | 0.000000000 | Se        | -1.665862000 | 2.954831000  | 0.000000000 |
| Al        | 1.392109000  | -1.512488000 | 0.000000000 | Al        | -1.713301000 | 0.765419000  | 0.000000000 |
| Se        | -0.936256000 | 2.005679000  | 1.772961000 | Al        | 0.480958000  | 2.845965000  | 0.000000000 |

|    |              |              |              |    |              |              |             |
|----|--------------|--------------|--------------|----|--------------|--------------|-------------|
| Al | -0.936256000 | -2.587222000 | 0.000000000  | Se | -2.617702000 | -1.189683000 | 0.000000000 |
| Se | -0.936256000 | 2.005679000  | -1.772961000 | Al | 1.715654000  | 0.581247000  | 0.000000000 |
| Se | 2.191781000  | 0.416783000  | 0.000000000  | Se | 2.887183000  | -1.215208000 | 0.000000000 |
| O  | -0.469649000 | -0.971080000 | 0.000000000  | O  | 0.000000000  | 0.152640000  | 0.000000000 |
| Al | -0.024156000 | 0.878785000  | 0.000000000  | Al | -0.478562000 | -1.622316000 | 0.000000000 |

**Table S7.** Cartesian Coordinates of the  $O@X_4E_4^{2+}$  ( $X = Ga$ ;  $E = Se$ ) clusters calculated at the PBE0-GD3/def2-TZVP level of theory.

| 5a |              |              |             | 5b |              |              |              |
|----|--------------|--------------|-------------|----|--------------|--------------|--------------|
| Se | 2.144664000  | -2.144664000 | 0.000000000 | Se | 0.860941000  | -3.697829000 | 0.000000000  |
| Ga | 0.000000000  | 1.922328000  | 0.000000000 | Ga | -1.595248000 | 2.919669000  | 0.000000000  |
| Ga | 0.000000000  | -1.922328000 | 0.000000000 | Ga | 1.392109000  | -1.512488000 | 0.000000000  |
| Se | 2.144664000  | 2.144664000  | 0.000000000 | Se | -0.936256000 | 2.005679000  | 1.772961000  |
| Se | -2.144664000 | -2.144664000 | 0.000000000 | Ga | -0.936256000 | -2.587222000 | 0.000000000  |
| Se | -2.144664000 | 2.144664000  | 0.000000000 | Se | -0.936256000 | 2.005679000  | -1.772961000 |
| Ga | 1.922328000  | 0.000000000  | 0.000000000 | Se | 2.191781000  | 0.416783000  | 0.000000000  |
| O  | 0.000000000  | 0.000000000  | 0.000000000 | O  | -0.469649000 | -0.971080000 | 0.000000000  |
| Ga | -1.922328000 | 0.000000000  | 0.000000000 | Ga | -0.024156000 | 0.878785000  | 0.000000000  |
| 5c |              |              |             | 5d |              |              |              |
| Se | 1.392523000  | -2.714640000 | 0.000000000 | Se | 1.673136000  | 2.950913000  | 0.000000000  |
| Se | -1.665862000 | 2.954831000  | 0.000000000 | Se | -2.889208000 | -1.208918000 | 0.000000000  |
| Ga | -1.713301000 | 0.765419000  | 0.000000000 | Ga | -0.473480000 | 2.846436000  | 0.000000000  |
| Ga | 0.480958000  | 2.845965000  | 0.000000000 | Se | 2.614275000  | -1.195549000 | 0.000000000  |
| Se | -2.617702000 | -1.189683000 | 0.000000000 | Se | -1.398217000 | -2.711972000 | 0.000000000  |
| Ga | 1.715654000  | 0.581247000  | 0.000000000 | Ga | 0.474359000  | -1.622775000 | 0.000000000  |
| Se | 2.887183000  | -1.215208000 | 0.000000000 | Ga | 1.714253000  | 0.761380000  | 0.000000000  |
| O  | 0.000000000  | 0.152640000  | 0.000000000 | O  | 0.000000000  | 0.153072000  | 0.000000000  |
| Ga | -0.478562000 | -1.622316000 | 0.000000000 | Ga | -1.715115000 | 0.586023000  | 0.000000000  |

**Table S8.** Cartesian Coordinates of the  $O@X_4E_4^{2+}$  ( $X = In$ ;  $E = Se$ ) clusters calculated at the PBE0-GD3/def2-TZVP level of theory.

| 6a |              |              |             | 6b |              |              |              |
|----|--------------|--------------|-------------|----|--------------|--------------|--------------|
| Se | 2.144664000  | -2.144664000 | 0.000000000 | Se | 0.860941000  | -3.697829000 | 0.000000000  |
| In | 0.000000000  | 1.922328000  | 0.000000000 | In | -1.595248000 | 2.919669000  | 0.000000000  |
| In | 0.000000000  | -1.922328000 | 0.000000000 | In | 1.392109000  | -1.512488000 | 0.000000000  |
| Se | 2.144664000  | 2.144664000  | 0.000000000 | Se | -0.936256000 | 2.005679000  | 1.772961000  |
| Se | -2.144664000 | -2.144664000 | 0.000000000 | In | -0.936256000 | -2.587222000 | 0.000000000  |
| Se | -2.144664000 | 2.144664000  | 0.000000000 | Se | -0.936256000 | 2.005679000  | -1.772961000 |
| In | 1.922328000  | 0.000000000  | 0.000000000 | Se | 2.191781000  | 0.416783000  | 0.000000000  |
| O  | 0.000000000  | 0.000000000  | 0.000000000 | O  | -0.469649000 | -0.971080000 | 0.000000000  |
| In | -1.922328000 | 0.000000000  | 0.000000000 | In | -0.024156000 | 0.878785000  | 0.000000000  |
| 6c |              |              |             | 6d |              |              |              |
| Se | 1.392523000  | -2.714640000 | 0.000000000 | Se | 1.673136000  | 2.950913000  | 0.000000000  |
| Se | -1.665862000 | 2.954831000  | 0.000000000 | Se | -2.889208000 | -1.208918000 | 0.000000000  |
| In | -1.713301000 | 0.765419000  | 0.000000000 | In | -0.473480000 | 2.846436000  | 0.000000000  |
| In | 0.480958000  | 2.845965000  | 0.000000000 | Se | 2.614275000  | -1.195549000 | 0.000000000  |
| Se | -2.617702000 | -1.189683000 | 0.000000000 | Se | -1.398217000 | -2.711972000 | 0.000000000  |
| In | 1.715654000  | 0.581247000  | 0.000000000 | In | 0.474359000  | -1.622775000 | 0.000000000  |
| Se | 2.887183000  | -1.215208000 | 0.000000000 | In | 1.714253000  | 0.761380000  | 0.000000000  |
| O  | 0.000000000  | 0.152640000  | 0.000000000 | O  | 0.000000000  | 0.153072000  | 0.000000000  |
| In | -0.478562000 | -1.622316000 | 0.000000000 | In | -1.715115000 | 0.586023000  | 0.000000000  |

**Table S9.** Cartesian Coordinates of the  $O@X_4E_4^{2+}$  ( $X = Al$ ;  $E = Te$ ) clusters calculated at the PBE0-GD3/def2-TZVP level of theory.

| 7a |              |              |              | 7b |              |              |              |
|----|--------------|--------------|--------------|----|--------------|--------------|--------------|
| Te | 2.179386000  | 2.179386000  | 0.000000000  | Al | 1.840714000  | -1.709971000 | -0.006282000 |
| Te | -2.179386000 | -2.179386000 | 0.000000000  | Te | -3.246097000 | 0.330622000  | -0.174802000 |
| Al | 0.000000000  | 2.006028000  | 0.000000000  | Te | 3.256568000  | -0.046581000 | -0.010022000 |
| Te | 2.179386000  | -2.179386000 | 0.000000000  | Te | -2.782160000 | -1.686398000 | 0.182516000  |
| Te | -2.179386000 | 2.179386000  | 0.000000000  | Al | -0.626117000 | -1.766952000 | -0.038873000 |
| Al | 0.000000000  | -2.006028000 | 0.000000000  | Te | 0.173784000  | 3.000051000  | 0.047381000  |
| Al | 2.006028000  | 0.000000000  | 0.000000000  | Al | 1.476893000  | 1.257992000  | 0.001300000  |
| O  | 0.000000000  | 0.000000000  | 0.000000000  | Al | -1.346809000 | 1.392254000  | 0.024457000  |
| Al | -2.006028000 | 0.000000000  | 0.000000000  | O  | -0.014828000 | 0.007985000  | -0.014978000 |
| 7c |              |              |              | 7d |              |              |              |
| Te | 1.461230000  | 2.196864000  | -0.454756000 | Te | -3.830514000 | 0.660252000  | -0.811870000 |
| Al | 4.259898000  | -1.349028000 | -0.730219000 | Al | 4.122244000  | -1.596391000 | -0.132571000 |
| Te | 3.373425000  | 1.426448000  | -0.268098000 | Al | 0.072039000  | -0.349413000 | 0.157370000  |
| Te | 1.893836000  | -1.173013000 | 0.864147000  | Te | 2.131326000  | 0.227369000  | -0.026465000 |
| Al | -3.093542000 | -0.099279000 | -0.057160000 | O  | -0.996753000 | 1.188371000  | 0.194963000  |
| Te | 3.290799000  | 0.282399000  | 1.431714000  | Te | -2.508098000 | 1.139180000  | 0.767528000  |
| Al | 0.392096000  | 0.325160000  | 0.052965000  | Al | -2.901826000 | -1.123023000 | -0.091264000 |
| Al | -6.387223000 | -0.288003000 | -0.067907000 | Te | -1.102303000 | -2.247302000 | 0.242787000  |
| O  | -1.327090000 | 0.002810000  | -0.037021000 | Al | 1.705202000  | 2.875957000  | -0.072612000 |

**Table S10.** Cartesian Coordinates of the  $O@X_4E_4^{2+}$  ( $X = Ga$ ;  $E = Te$ ) clusters calculated at the PBE0-GD3/def2-TZVP level of theory.

| 8a |              |              |              | 8b |              |              |              |
|----|--------------|--------------|--------------|----|--------------|--------------|--------------|
| Te | 2.179386000  | 2.179386000  | 0.000000000  | Ga | 1.840714000  | -1.709971000 | -0.006282000 |
| Te | -2.179386000 | -2.179386000 | 0.000000000  | Te | -3.246097000 | 0.330622000  | -0.174802000 |
| Ga | 0.000000000  | 2.006028000  | 0.000000000  | Te | 3.256568000  | -0.046581000 | -0.010022000 |
| Te | 2.179386000  | -2.179386000 | 0.000000000  | Te | -2.782160000 | -1.686398000 | 0.182516000  |
| Te | -2.179386000 | 2.179386000  | 0.000000000  | Ga | -0.626117000 | -1.766952000 | -0.038873000 |
| Ga | 0.000000000  | -2.006028000 | 0.000000000  | Te | 0.173784000  | 3.000051000  | 0.047381000  |
| Ga | 2.006028000  | 0.000000000  | 0.000000000  | Ga | 1.476893000  | 1.257992000  | 0.001300000  |
| O  | 0.000000000  | 0.000000000  | 0.000000000  | Ga | -1.346809000 | 1.392254000  | 0.024457000  |
| Ga | -2.006028000 | 0.000000000  | 0.000000000  | O  | -0.014828000 | 0.007985000  | -0.014978000 |
| 8c |              |              |              | 8d |              |              |              |
| Te | 1.461230000  | 2.196864000  | -0.454756000 | Te | -3.830514000 | 0.660252000  | -0.811870000 |
| Ga | 4.259898000  | -1.349028000 | -0.730219000 | Ga | 4.122244000  | -1.596391000 | -0.132571000 |
| Te | 3.373425000  | 1.426448000  | -0.268098000 | Ga | 0.072039000  | -0.349413000 | 0.157370000  |
| Te | 1.893836000  | -1.173013000 | 0.864147000  | Te | 2.131326000  | 0.227369000  | -0.026465000 |
| Ga | -3.093542000 | -0.099279000 | -0.057160000 | O  | -0.996753000 | 1.188371000  | 0.194963000  |
| Te | 3.290799000  | 0.282399000  | 1.431714000  | Te | -2.508098000 | 1.139180000  | 0.767528000  |
| Ga | 0.392096000  | 0.325160000  | 0.052965000  | Ga | -2.901826000 | -1.123023000 | -0.091264000 |
| Ga | -6.387223000 | -0.288003000 | -0.067907000 | Te | -1.102303000 | -2.247302000 | 0.242787000  |
| O  | -1.327090000 | 0.002810000  | -0.037021000 | Ga | 1.705202000  | 2.875957000  | -0.072612000 |

**Table S11.** Cartesian Coordinates of the  $O@X_4E_4^{2+}$  ( $X = In$ ;  $E = Te$ ) clusters calculated at the PBE0-GD3/def2-TZVP level of theory.

| 9a |              |              |             | 9b |              |              |              |
|----|--------------|--------------|-------------|----|--------------|--------------|--------------|
| Te | 2.179386000  | 2.179386000  | 0.000000000 | In | 1.840714000  | -1.709971000 | -0.006282000 |
| Te | -2.179386000 | -2.179386000 | 0.000000000 | Te | -3.246097000 | 0.330622000  | -0.174802000 |
| In | 0.000000000  | 2.006028000  | 0.000000000 | Te | 3.256568000  | -0.046581000 | -0.010022000 |
| Te | 2.179386000  | -2.179386000 | 0.000000000 | Te | -2.782160000 | -1.686398000 | 0.182516000  |
| Te | -2.179386000 | 2.179386000  | 0.000000000 | In | -0.626117000 | -1.766952000 | -0.038873000 |
| In | 0.000000000  | -2.006028000 | 0.000000000 | Te | 0.173784000  | 3.000051000  | 0.047381000  |
| In | 2.006028000  | 0.000000000  | 0.000000000 | In | 1.476893000  | 1.257992000  | 0.001300000  |

|           |              |              |              |           |              |              |              |
|-----------|--------------|--------------|--------------|-----------|--------------|--------------|--------------|
| O         | 0.000000000  | 0.000000000  | 0.000000000  | In        | -1.346809000 | 1.392254000  | 0.024457000  |
| In        | -2.006028000 | 0.000000000  | 0.000000000  | O         | -0.014828000 | 0.007985000  | -0.014978000 |
| <b>9c</b> |              |              |              | <b>9d</b> |              |              |              |
| Te        | 1.461230000  | 2.196864000  | -0.454756000 | Te        | -3.830514000 | 0.660252000  | -0.811870000 |
| In        | 4.259898000  | -1.349028000 | -0.730219000 | In        | 4.122244000  | -1.596391000 | -0.132571000 |
| Te        | 3.373425000  | 1.426448000  | -0.268098000 | In        | 0.072039000  | -0.349413000 | 0.157370000  |
| Te        | 1.893836000  | -1.173013000 | 0.864147000  | Te        | 2.131326000  | 0.227369000  | -0.026465000 |
| In        | -3.093542000 | -0.099279000 | -0.057160000 | O         | -0.996753000 | 1.188371000  | 0.194963000  |
| Te        | 3.290799000  | 0.282399000  | 1.431714000  | Te        | -2.508098000 | 1.139180000  | 0.767528000  |
| In        | 0.392096000  | 0.325160000  | 0.052965000  | In        | -2.901826000 | -1.123023000 | -0.091264000 |
| In        | -6.387223000 | -0.288003000 | -0.067907000 | Te        | -1.102303000 | -2.247302000 | 0.242787000  |
| O         | -1.327090000 | 0.002810000  | -0.037021000 | In        | 1.705202000  | 2.875957000  | -0.072612000 |
